# Supplementary material for: Interactive Gene Expression Patterns of Susceptible and Resistant Lens ervoides Recombinant Inbred Lines and the Necrotroph Ascochyta lentis
Source: Front Microbiol. 2020 Jun 24;11:1259. doi: 10.3389/fmicb.2020.01259 (PMC7326948; doi:10.3389/fmicb.2020.01259)
Supplement: TABLE S4 — Information of consensus modules generated by weighted gene co-expression analysis (WGCNA) for two Lens ervoides RILs. (1) The consensus module eigengene generated by WGCNA for two Lens ervoides RILs over time. (2) List of L. ervoides genes with known Medicago truncatula orthologs for three major consensus modules. [file Table_4.xlsx]

## Sheet: Sheet 1
Sheet 1. The consensus module eigengene generated by WGCNA for two Lens ervoides RILs over time.
RILs	Treatment	Hpi	Rep	MEred	MEorange	MEturquoise	MEgrey60	MEyellow	MEpink	MEdarkorange	MEskyblue	MEblack	MEbrown	MEmagenta	MEroyalbue	MEsteelblue	MEpaleturquoise	MEcyan	MElightyellow	MEmidnightblue	MEdarkgrey	MEsaddlebrown	MEgreenyellow	MElightcyan	MEdarkred	MEdarkturquoise	MEwhite	MEblue	MEtan	MEsalmon	MEgreen	MEdarkgreen	MEpurple	MElightgreen	MEgrey
LR-66-629	MOCK	24	1	-0.278506	-0.14597	-0.218713	-0.42829	-0.320861	-0.154425	-0.196029	-0.141173	-0.103071	-0.136702	0.0554551	-0.37296	-0.0297534	-0.353792	-0.328871	-0.276824	-0.196357	-0.281295	-0.147819	0.529866	0.0734008	0.32355	-0.172815	-0.0302168	0.151437	-0.117776	-0.0976411	0.441269	0.223045	0.276063	0.147579	0.114838
LR-66-629	MOCK	24	2	-0.175019	-0.144487	-0.227619	-0.457449	-0.296418	-0.167336	-0.199032	-0.174455	0.169043	-0.0444899	0.346751	-0.389033	-0.192983	0.398115	-0.105514	0.00395429	-0.137177	-0.316543	-0.150694	0.361122	-0.0612098	0.199773	-0.112329	0.0775747	0.376539	0.736098	-0.147507	0.375971	0.131684	0.347903	0.0147611	0.0801836
LR-66-629	MOCK	24	3	-0.240408	-0.123987	-0.249812	-0.48229	-0.321574	-0.166631	-0.224187	-0.174526	-0.0110186	-0.15544	0.121159	-0.399733	-0.120112	-0.0153434	-0.269705	-0.121023	-0.23035	-0.30665	-0.175894	0.495753	0.00832368	0.237548	-0.15127	0.0601133	0.227526	0.338396	-0.114597	0.459619	0.231268	0.320635	0.116905	-0.0178465
LR-66-629	A.lentis	24	1	-0.123511	-0.0969075	0.10269	0.00477731	0.0118024	-0.0444502	0.0358799	-0.0682963	0.143002	0.130659	0.106125	0.0458761	0.125096	-0.171795	0.112683	0.0499708	0.120529	0.115476	0.0779953	0.121035	0.351453	0.309584	-0.115641	0.0477749	-0.0854252	-0.168177	-0.176408	-0.0545108	-0.1469	0.048243	0.00347047	0.00649086
LR-66-629	A.lentis	24	2	-0.0929721	-0.1349	0.0501105	-0.0414496	-0.0265522	-0.0976152	0.0114161	-0.0812506	0.154567	0.1935	0.199074	0.241541	0.0954039	-0.0230474	0.136089	0.060916	0.243268	0.466971	0.843209	-0.0685176	0.0655511	0.237587	-0.0685268	-0.0101624	0.015441	-0.0799801	-0.162283	-0.0967038	-0.200165	0.0622115	-0.185349	0.713531
LR-66-629	A.lentis	24	3	0.0281361	-0.167407	0.136627	0.0280622	0.0838286	0.0234002	0.191556	0.0626146	0.273265	0.324888	0.334128	0.227255	-0.0046877	0.169514	0.29276	0.236556	0.745334	0.182956	0.330078	-0.23312	-0.079986	0.307874	-0.012065	0.125173	0.168109	0.0955784	-0.145828	-0.205739	-0.247552	-0.0584806	-0.295775	-0.0183961
LR-66-629	MOCK	96	1	-0.144572	-0.0951364	-0.0827102	0.234525	-0.155335	-0.12393	-0.144614	0.0120088	-0.247128	0.0344262	-0.0688106	0.37417	0.315626	-0.39966	-0.200373	-0.4361	-0.192238	0.0744003	0.0240269	-0.128663	-0.200557	-0.00377562	0.434622	0.0517249	-0.0239005	-0.293145	0.393406	0.108188	0.15558	0.150102	0.441315	0.219414
LR-66-629	MOCK	96	2	-0.17395	-0.162134	-0.146796	0.0183144	-0.246522	-0.141841	-0.140809	-0.0228823	-0.168079	0.0425571	0.142696	0.230282	0.0872261	-0.166548	-0.214408	-0.36089	-0.0754165	-0.100419	0.0632089	-0.0661748	-0.261643	0.105506	0.488944	0.393379	0.22983	0.0549388	0.319571	0.211977	0.139311	0.299448	0.276858	-0.143856
LR-66-629	MOCK	96	3	0.330391	0.306513	-0.282369	-0.0537309	-0.0594828	-0.119299	-0.115105	-0.0853629	-0.394422	-0.387416	-0.376063	0.0896069	-0.251309	-0.0307892	-0.235648	-0.145257	-0.149188	-0.100101	-0.0120737	-0.189128	-0.330761	-0.256049	0.0572534	0.240777	0.0403783	0.0478518	0.34241	0.0669263	0.282048	-0.248289	0.0150604	-0.271404
LR-66-629	A.lentis	96	1	-0.285848	-0.0862166	0.359065	0.298443	0.10852	-0.0478976	-0.0911716	-0.0841279	0.337837	0.325502	0.0982804	0.144229	0.464277	-0.0540719	0.205585	0.0294728	-0.129837	-0.0606648	-0.129385	0.170093	0.618961	0.0139839	-0.127501	-0.335137	-0.305423	-0.27388	-0.160099	-0.125798	-0.276955	0.200055	0.26696	-0.291488
LR-66-629	A.lentis	96	2	-0.0874314	-0.202884	0.357149	0.280294	0.230864	-0.0397483	-0.0541251	-0.0748328	0.39854	0.329724	0.121478	0.085329	0.244358	0.584682	0.420139	0.22973	-0.104413	0.234418	-0.0936535	-0.0773581	0.24329	-0.23975	-0.115544	-0.408205	-0.31073	0.119844	-0.187102	-0.251586	-0.369749	0.0102411	-0.166266	0.137893
LR-66-629	A.lentis	96	3	-0.0663084	-0.185361	0.327223	0.217758	0.259633	-0.0147281	0.0496345	0.116205	0.16736	0.155665	-0.108851	0.114283	0.291069	0.0652096	0.269779	0.133366	-0.108362	0.522617	-0.0684588	-0.0998529	0.102784	-0.229402	-0.163136	-0.350039	-0.358004	-0.201971	-0.155059	-0.235332	-0.256438	-0.0924837	-0.109757	-0.207187
LR-66-629	MOCK	192	1	0.0374394	0.00729136	-0.164994	0.140162	-0.174526	-0.137342	-0.146758	-0.115355	-0.155807	-0.013908	0.128129	0.126667	-0.0230763	-0.120345	-0.170157	-0.143939	-0.0189986	-0.160222	-0.0842653	-0.159772	-0.167858	0.0140252	0.365918	0.272395	0.31641	0.0159907	0.309853	0.0622943	0.229522	0.00411655	0.27302	-0.123558
LR-66-629	MOCK	192	2	0.00997203	0.0601201	-0.148345	0.146781	-0.17274	-0.115475	-0.112143	-0.0843337	-0.173289	0.00770562	0.122347	0.128959	0.0124154	-0.205495	-0.209036	-0.191727	0.00837093	-0.155534	-0.0565694	-0.160041	-0.179958	0.111954	0.397494	0.374539	0.28844	-0.117824	0.303226	0.0501272	0.230774	0.0143922	0.273534	-0.0850093
LR-66-629	MOCK	192	3	0.591332	0.586406	-0.365375	-0.0480216	-0.0359489	-0.180602	-0.239227	-0.201204	-0.480908	-0.538214	-0.546189	-0.00491905	-0.383891	-0.00217069	-0.270427	-0.074845	-0.265308	-0.162043	-0.14836	-0.294004	-0.307598	-0.422486	-0.0972761	0.108077	-0.00196957	0.00486078	0.309963	-0.063146	0.383154	-0.453096	-0.138976	-0.0936026
LR-66-629	A.lentis	192	1	0.271234	0.452813	0.143744	-0.0447004	0.349472	0.586995	0.395208	0.0698615	0.026086	-0.171702	-0.215733	-0.297045	-0.333455	0.0927488	0.162469	0.421978	0.221238	-0.118355	-0.0684542	0.0244695	0.155962	-0.21349	-0.22158	-0.187833	-0.180344	-0.0187552	-0.234303	-0.20844	-0.131575	-0.297335	-0.33476	-0.165545
LR-66-629	A.lentis	192	2	0.35891	0.304097	0.0516766	-0.0406753	0.381814	0.435204	0.628756	0.165887	-0.0291828	-0.247159	-0.315578	-0.259409	-0.359269	0.233577	0.158792	0.396073	0.137075	0.100252	-0.0468119	-0.0673875	0.0381899	-0.297555	-0.23681	-0.196708	-0.208853	0.0703103	-0.193378	-0.21558	-0.107848	-0.333721	-0.300742	0.309312
LR-66-629	A.lentis	192	3	0.041111	-0.17185	0.358447	0.227489	0.384026	0.50572	0.35075	0.881223	0.0932058	0.150404	-0.144398	-0.0851009	0.0630647	-0.000789047	0.245844	0.188589	0.131829	0.0647373	-0.15608	-0.15832	-0.0683444	-0.198877	-0.149738	-0.233227	-0.339461	-0.212361	-0.204226	-0.319537	-0.2692	-0.250006	-0.297838	-0.163768
LR-66-570	MOCK	24	1	-0.284158	-0.154074	-0.232806	-0.139103	-0.275545	-0.146782	-0.206484	-0.125818	-0.332738	-0.281319	-0.190853	-0.33635	0.00356841	-0.341956	-0.518735	-0.488034	-0.323208	-0.317217	-0.179952	0.518824	0.19745	0.152414	-0.0224531	-0.032864	-0.0957543	-0.228771	-0.0850643	0.420979	0.423222	0.113607	0.334877	-0.176479
LR-66-570	MOCK	24	2	-0.188112	-0.124819	-0.258273	-0.155868	-0.250646	-0.142531	-0.194845	-0.138962	-0.339115	-0.319891	-0.196392	-0.372483	-0.091065	-0.261157	-0.476717	-0.382865	-0.284869	-0.299137	-0.177765	0.460741	0.153584	0.156331	-0.0658024	0.0114917	-0.0410946	-0.138646	-0.0931101	0.394611	0.425968	0.0330645	0.209813	-0.139204
LR-66-570	MOCK	24	3	-0.0968732	0.157969	-0.276056	-0.178302	-0.229906	-0.133584	-0.156598	-0.159773	-0.25263	-0.309561	-0.127864	-0.359304	-0.225404	-0.184977	-0.42595	-0.194329	-0.197657	-0.330955	-0.189774	0.410684	0.0913584	0.181146	-0.0864061	0.0553789	0.0887089	-0.0224677	-0.0626127	0.362123	0.417912	0.0240727	0.152991	-0.0138664
LR-66-570	A.lentis	24	1	-0.0621749	-0.131488	0.0520352	0.0491611	-0.0388594	-0.0640964	0.236876	0.00422811	-0.0479522	0.137944	0.115921	0.00687807	-0.0104078	-0.0517539	0.0606167	-0.0636569	0.226409	0.127324	0.348002	0.0447531	0.0911137	0.476805	0.242232	0.739972	0.0475575	-0.0796119	-0.169113	-0.0525796	-0.111112	-0.0422483	-0.146594	0.26474
LR-66-570	A.lentis	24	2	-0.04734	-0.138941	0.167434	0.208501	0.0448524	-0.0582466	0.209733	-0.020302	0.0112229	0.311236	0.165529	0.280601	0.193257	-0.101734	0.184173	-0.0149304	0.433086	0.576052	0.738258	-0.144451	0.0915185	0.420902	0.408995	0.364992	0.0492279	-0.172317	-0.153535	-0.187156	-0.228101	-0.0593027	-0.124476	-0.0769311
LR-66-570	A.lentis	24	3	0.0650724	-0.094024	0.186664	0.204241	0.0769191	-0.0597843	0.0737708	-0.0652036	0.238308	0.459549	0.454	0.273003	0.131559	0.184908	0.356321	0.270513	0.666244	0.311469	0.383199	-0.26916	-0.0541798	0.296779	0.528386	0.201251	0.294298	0.121856	-0.112407	-0.245443	-0.321503	-0.0313172	-0.289041	0.00240085
LR-66-570	MOCK	96	1	0.0092541	0.0878323	-0.165154	-0.289398	-0.168365	-0.154923	-0.170402	-0.1262	0.418163	0.122827	0.359184	0.144806	-0.0887045	0.408203	0.156021	0.33125	0.0223682	-0.117986	-0.0471481	-0.13974	-0.258589	-0.0645311	-0.185231	0.0492321	0.34844	0.538923	0.317679	0.0960066	-0.0403339	0.241561	-0.0171285	-0.152728
LR-66-570	MOCK	96	2	-0.15138	-0.0870145	-0.122651	-0.239432	-0.204575	-0.16182	-0.202169	-0.0932543	0.318417	0.185529	0.281234	0.263478	0.189689	-0.0155509	-0.00359703	0.0662365	-0.0415731	-0.0840441	-0.0226551	-0.105192	-0.226675	0.0381667	-0.175521	-0.0474024	0.250496	0.149841	0.309877	0.164794	-0.0304329	0.46521	0.199125	-0.194553
LR-66-570	MOCK	96	3	-0.0974103	-0.0657646	-0.15459	-0.201808	-0.157422	-0.175516	-0.212733	-0.0975068	0.205352	0.0175414	0.0708915	0.313611	0.207003	-0.0552914	-0.0358707	0.0251394	-0.182736	0.0743766	-0.0551627	-0.115425	-0.208174	-0.0791223	-0.246614	-0.072888	0.0869975	0.0777357	0.327914	0.125557	0.100032	0.287359	0.371806	0.00565656
LR-66-570	A.lentis	96	1	-0.137311	-0.188533	0.385113	0.367728	0.163328	0.106269	-0.0838914	-0.132088	0.0494314	0.220153	-0.0201551	0.0154471	0.326737	0.042793	0.184425	-0.0903485	-0.0671052	-0.0477629	-0.026971	0.0551262	0.543968	-0.212057	0.220157	-0.29045	-0.311303	-0.192287	-0.250119	-0.22929	-0.350133	-0.0975813	-0.135489	0.0903179
LR-66-570	A.lentis	96	2	-0.0568358	-0.165791	0.254924	0.339648	0.173487	0.0721366	0.10097	0.330794	-0.129313	0.083969	-0.174891	0.0887908	0.526902	-0.162246	0.082196	-0.200893	-0.0814381	0.294078	-0.0951627	-0.0965382	0.016836	-0.140996	0.16137	-0.17701	-0.300141	-0.300859	-0.17576	-0.201615	-0.161848	-0.152566	0.0236796	-0.238566
LR-66-570	A.lentis	96	3	-0.0354259	-0.126225	0.217198	0.185743	0.157875	0.108621	0.346098	0.0187019	-0.0398397	-0.019081	-0.108745	-0.188698	-0.0934943	0.15465	0.146858	-0.0429148	-0.005979	-0.0574379	-0.0572835	0.11502	0.345113	-0.0666084	0.0424526	-0.0900317	-0.255076	-0.0233934	-0.245016	-0.091846	-0.0609179	-0.165558	-0.0575544	0.19594
LR-66-570	MOCK	192	1	0.19294	0.508532	-0.272876	-0.336165	-0.150875	-0.15622	-0.18288	-0.154692	0.176167	-0.152128	0.0653829	0.0640681	-0.31983	0.300359	0.0535587	0.365806	-0.0144604	-0.182263	-0.0822697	-0.18754	-0.33813	-0.162052	-0.279222	0.00477007	0.332076	0.4495	0.333942	0.097195	0.118845	0.069627	-0.0512994	0.00298555
LR-66-570	MOCK	192	2	-0.0707191	-0.0528377	-0.16235	-0.205259	-0.172947	-0.176406	-0.216537	-0.136384	0.247368	0.0621098	0.17039	0.251907	0.101423	-0.0224617	0.00805777	0.0715077	-0.117472	-0.0343852	-0.103118	-0.152703	-0.254999	-0.114771	-0.245128	-0.0833162	0.190347	0.145367	0.317712	0.094639	0.0715312	0.290901	0.263165	-0.30907
LR-66-570	MOCK	192	3	0.0637538	0.658414	-0.205172	-0.241608	-0.123096	-0.161115	-0.174204	-0.117643	0.163987	-0.0941318	0.0314339	0.178286	0.00354306	0.00380475	-0.00181993	0.196366	-0.0776591	-0.00910111	-0.0910068	-0.161838	-0.248083	-0.0997602	-0.28739	-0.0258176	0.198642	0.15437	0.334233	0.0880239	0.171627	0.118037	0.230914	-0.0300095
LR-66-570	A.lentis	192	1	0.0458604	-0.167024	0.426715	0.326237	0.284096	0.719486	0.116703	0.0743071	-0.121181	0.0950642	-0.117375	-0.220066	-0.19479	-0.201857	0.00420972	-0.0411632	0.107241	-0.19154	-0.143502	0.0056599	0.209117	-0.265114	0.122806	-0.248551	-0.300462	-0.278103	-0.251997	-0.291507	-0.265812	-0.273474	-0.350036	0.713537
LR-66-570	A.lentis	192	2	-0.0206304	-0.138943	0.270761	0.194108	0.219239	0.450311	0.637673	0.837184	-0.187174	-0.0254683	-0.222598	-0.245957	-0.1922	-0.256311	-0.0302862	-0.165795	0.0481671	0.0348945	-0.0644194	0.0705883	0.0595269	-0.044079	0.0674457	-0.120654	-0.287777	-0.307335	-0.245621	-0.161047	-0.078643	-0.258957	-0.130185	0.253163
LR-66-570	A.lentis	192	3	0.871489	0.222732	-0.110917	0.111576	0.652439	0.134203	0.07892	0.102613	-0.378471	-0.494343	-0.555095	-0.158017	-0.467786	0.560581	0.25654	0.35811	-0.10936	0.253636	-0.133269	-0.30881	-0.210756	-0.473453	-0.200076	-0.238102	-0.295184	0.106198	-0.0970008	-0.383445	-0.0803007	-0.562435	-0.484567	-0.197334

## Sheet: Sheet 2
Sheet 2. List of L. ervoides genes with known Medicago truncatula orthologs for three major consensus modules.
Gene_ID	Medicago truncatula ortholog	Module
Lc00001	Mtr_5g099370	turquoise
Lc00006	#N/A	turquoise
Lc00009	Mtr_5g099280	blue
Lc00010	#N/A	blue
Lc00011	Mtr_5g099240	turquoise
Lc00013	Mtr_4g094578	turquoise
Lc00015	Mtr_0110s0010	yellow
Lc00018	Mtr_5g099070	turquoise
Lc00021	Mtr_5g099030	blue
Lc00023	Mtr_5g099010	blue
Lc00025	Mtr_5g098970	turquoise
Lc00026	Mtr_5g098940	yellow
Lc00031	Mtr_5g098800	blue
Lc00034	Mtr_5g098770	turquoise
Lc00035	Mtr_5g098730	blue
Lc00036	Mtr_5g098720	turquoise
Lc00039	Mtr_3g114910	blue
Lc00040	Mtr_5g098580	turquoise
Lc00043	Mtr_5g098510	turquoise
Lc00045	Mtr_5g098420	blue
Lc00047	Mtr_1g069450	turquoise
Lc00048	Mtr_1g069455	blue
Lc00049	Mtr_1g069460	turquoise
Lc00052	Mtr_1g069470	blue
Lc00054	Mtr_1g069560	blue
Lc00056	Mtr_1g069570	blue
Lc00057	Mtr_1g069575	turquoise
Lc00064	Mtr_1g484940	blue
Lc00066	Mtr_1g081260	blue
Lc00067	Mtr_1g088885	blue
Lc00072	Mtr_1g090050	turquoise
Lc00078	Mtr_1g071300	turquoise
Lc00083	Mtr_1g094780	blue
Lc00085	Mtr_1g039270	blue
Lc00090	Mtr_1g040675	blue
Lc00091	Mtr_1g051165	yellow
Lc00094	Mtr_1g077840	blue
Lc00095	Mtr_1g077840	turquoise
Lc00097	Mtr_1g056460	turquoise
Lc00099	Mtr_1g094870	blue
Lc00100	Mtr_1g094850	turquoise
Lc00102	Mtr_1g094840	turquoise
Lc00103	Mtr_1g094830	turquoise
Lc00104	Mtr_8g467540	turquoise
Lc00107	Mtr_1g054540	blue
Lc00109	Mtr_1g067220	blue
Lc00110	Mtr_1g110370	yellow
Lc00117	Mtr_1g116140	turquoise
Lc00119	Mtr_1g038850	turquoise
Lc00127	Mtr_1g052470	turquoise
Lc00130	Mtr_1g007320	blue
Lc00132	Mtr_1g112910	turquoise
Lc00134	Mtr_1g112910	turquoise
Lc00135	Mtr_1g112940	turquoise
Lc00137	Mtr_1g112980	blue
Lc00139	Mtr_1g113000	turquoise
Lc00144	Mtr_1g087540	blue
Lc00151	Mtr_1g070190	turquoise
Lc00155	Mtr_1g070170	blue
Lc00165	Mtr_1g101440	turquoise
Lc00166	Mtr_1g082300	turquoise
Lc00168	Mtr_1g075100	yellow
Lc00170	Mtr_1g090300	turquoise
Lc00171	#N/A	blue
Lc00172	Mtr_1g090270	blue
Lc00173	#N/A	turquoise
Lc00175	Mtr_1g084160	yellow
Lc00176	Mtr_1g086980	turquoise
Lc00181	Mtr_1g052475	turquoise
Lc00183	Mtr_1g077190	turquoise
Lc00200	Mtr_1g096230	turquoise
Lc00204	Mtr_1g096000	blue
Lc00206	#N/A	turquoise
Lc00209	Mtr_1g072370	blue
Lc00210	Mtr_1g072360	blue
Lc00215	Mtr_6g045483	turquoise
Lc00219	Mtr_1g476030	turquoise
Lc00220	#N/A	turquoise
Lc00224	#N/A	blue
Lc00230	Mtr_1g111020	turquoise
Lc00247	Mtr_1g492850	turquoise
Lc00249	Mtr_1g492840	turquoise
Lc00250	Mtr_1g492830	turquoise
Lc00251	Mtr_1g492820	blue
Lc00263	Mtr_1g106875	blue
Lc00271	Mtr_1g032500	turquoise
Lc00273	Mtr_1g032440	yellow
Lc00286	Mtr_1g099370	blue
Lc00288	Mtr_1g103850	blue
Lc00290	Mtr_1g064630	turquoise
Lc00303	Mtr_1g082550	turquoise
Lc00305	Mtr_1g040915	turquoise
Lc00306	Mtr_1g040905	yellow
Lc00308	Mtr_1g081180	blue
Lc00313	Mtr_1g085090	blue
Lc00319	Mtr_1g099190	yellow
Lc00328	Mtr_7g057230	turquoise
Lc00333	Mtr_1g007870	blue
Lc00334	Mtr_1g031910	turquoise
Lc00351	Mtr_1g080820	yellow
Lc00354	#N/A	yellow
Lc00358	Mtr_1g075490	blue
Lc00362	Mtr_1g027010	turquoise
Lc00368	Mtr_1g086990	blue
Lc00372	Mtr_1g106075	blue
Lc00377	Mtr_1g057790	turquoise
Lc00391	Mtr_1g086650	turquoise
Lc00397	Mtr_1g007480	blue
Lc00398	Mtr_1g007490	blue
Lc00408	#N/A	turquoise
Lc00411	Mtr_1g090853	blue
Lc00435	Mtr_1g091040	blue
Lc00436	Mtr_1g081580	turquoise
Lc00437	#N/A	turquoise
Lc00452	Mtr_1g029130	turquoise
Lc00453	Mtr_1g029140	blue
Lc00456	Mtr_1g064560	blue
Lc00457	Mtr_1g087790	turquoise
Lc00459	Mtr_1g071480	blue
Lc00469	Mtr_1g043450	turquoise
Lc00472	Mtr_1g088260	blue
Lc00480	Mtr_1g069000	turquoise
Lc00496	Mtr_1g029720	turquoise
Lc00497	Mtr_1g029730	blue
Lc00500	Mtr_1g062980	turquoise
Lc00502	Mtr_1g045060	blue
Lc00504	Mtr_1g072720	turquoise
Lc00505	Mtr_1g086370	turquoise
Lc00509	Mtr_1g097090	blue
Lc00515	Mtr_1g104680	turquoise
Lc00516	Mtr_1g045900	yellow
Lc00518	Mtr_1g045930	turquoise
Lc00522	Mtr_1g076840	turquoise
Lc00528	Mtr_1g115325	turquoise
Lc00529	Mtr_1g115315	turquoise
Lc00533	Mtr_1g115285	yellow
Lc00537	Mtr_1g030010	blue
Lc00553	Mtr_1g060620	yellow
Lc00554	Mtr_1g063020	blue
Lc00556	Mtr_1g063000	yellow
Lc00558	Mtr_1g068630	blue
Lc00560	Mtr_1g080840	yellow
Lc00576	Mtr_1g087520	turquoise
Lc00577	Mtr_1g086070	turquoise
Lc00578	Mtr_1g007120	blue
Lc00580	Mtr_1g114520	turquoise
Lc00583	Mtr_1g067110	turquoise
Lc00584	Mtr_1g029750	turquoise
Lc00588	Mtr_1g056800	turquoise
Lc00590	Mtr_1g095040	turquoise
Lc00596	Mtr_1g029710	turquoise
Lc00599	Mtr_1g051820	blue
Lc00600	Mtr_1g051810	blue
Lc00602	Mtr_1g041320	turquoise
Lc00616	Mtr_1g099810	turquoise
Lc00617	Mtr_1g098530	blue
Lc00618	Mtr_1g098510	yellow
Lc00622	Mtr_1g029000	turquoise
Lc00625	Mtr_1g074370	turquoise
Lc00628	Mtr_1g080910	turquoise
Lc00629	Mtr_8g074720	turquoise
Lc00639	Mtr_1g061130	turquoise
Lc00643	Mtr_2g031660	blue
Lc00647	Mtr_3g100470	yellow
Lc00650	Mtr_1g045520	yellow
Lc00657	Mtr_1g007380	turquoise
Lc00660	Mtr_1g072850	turquoise
Lc00669	Mtr_1g032120	turquoise
Lc00672	Mtr_1g082810	blue
Lc00675	Mtr_1g061840	blue
Lc00679	Mtr_1g037830	turquoise
Lc00686	Mtr_1g075880	turquoise
Lc00692	Mtr_1g090110	turquoise
Lc00695	Mtr_1g090060	yellow
Lc00708	Mtr_1g109580	blue
Lc00710	Mtr_1g109500	turquoise
Lc00712	Mtr_1g109470	turquoise
Lc00716	#N/A	blue
Lc00720	Mtr_1g055315	turquoise
Lc00723	Mtr_1g079510	turquoise
Lc00725	#N/A	turquoise
Lc00728	Mtr_1g061240	blue
Lc00730	Mtr_3g085705	turquoise
Lc00731	Mtr_1g117010	blue
Lc00732	Mtr_1g117000	blue
Lc00737	Mtr_3g085700	yellow
Lc00738	Mtr_1g117060	yellow
Lc00741	Mtr_1g102170	blue
Lc00743	#N/A	turquoise
Lc00764	Mtr_1g088190	blue
Lc00770	#N/A	turquoise
Lc00771	Mtr_1g038650	blue
Lc00776	Mtr_1g063910	turquoise
Lc00781	Mtr_1g064240	turquoise
Lc00782	Mtr_1g064230	blue
Lc00783	Mtr_0690s0010	turquoise
Lc00784	Mtr_1g033480	blue
Lc00790	Mtr_1g079780	yellow
Lc00791	Mtr_4g036550	turquoise
Lc00792	Mtr_4g036505	blue
Lc00797	Mtr_1g103070	blue
Lc00800	Mtr_1g116650	blue
Lc00803	Mtr_1g116875	blue
Lc00804	Mtr_8g092560	yellow
Lc00809	Mtr_1g029350	blue
Lc00813	Mtr_1g070390	turquoise
Lc00818	Mtr_0054s0050	turquoise
Lc00819	Mtr_1g073260	turquoise
Lc00823	Mtr_1g026510	yellow
Lc00828	Mtr_1g060070	blue
Lc00847	Mtr_1g043760	turquoise
Lc00854	Mtr_1g034360	blue
Lc00860	Mtr_1g059840	yellow
Lc00868	Mtr_1g072540	blue
Lc00869	Mtr_1g051765	blue
Lc00875	Mtr_1g083450	yellow
Lc00878	Mtr_1g087330	turquoise
Lc00888	Mtr_1g105615	turquoise
Lc00890	Mtr_1g082870	turquoise
Lc00894	Mtr_1g077930	blue
Lc00895	Mtr_1g077940	turquoise
Lc00897	Mtr_1g077990	blue
Lc00907	Mtr_1g084120	blue
Lc00908	Mtr_1g083400	turquoise
Lc00912	Mtr_1g083390	yellow
Lc00928	Mtr_1g088590	turquoise
Lc00937	#N/A	yellow
Lc00939	#N/A	blue
Lc00941	Mtr_1g108640	turquoise
Lc00943	Mtr_1g108640	turquoise
Lc00945	Mtr_0121s0090	turquoise
Lc00948	Mtr_1g492940	turquoise
Lc00949	Mtr_1g492950	blue
Lc00951	#N/A	blue
Lc00954	Mtr_1g041895	turquoise
Lc00957	Mtr_4g019900	blue
Lc00958	Mtr_4g019910	turquoise
Lc00973	Mtr_1g070085	blue
Lc00977	Mtr_1g070160	turquoise
Lc00978	Mtr_1g052425	blue
Lc00979	Mtr_1g075320	blue
Lc00980	Mtr_1g075310	blue
Lc00984	Mtr_1g107565	blue
Lc00990	Mtr_1g096050	turquoise
Lc00995	Mtr_1g101130	blue
Lc00996	Mtr_1g037470	turquoise
Lc01005	Mtr_1g078070	turquoise
Lc01006	Mtr_1g099545	blue
Lc01012	Mtr_3g063070	yellow
Lc01014	Mtr_1g036390	yellow
Lc01015	Mtr_1g069065	turquoise
Lc01016	Mtr_1g069055	yellow
Lc01017	Mtr_1g100120	yellow
Lc01025	Mtr_1g067320	turquoise
Lc01029	Mtr_1g092900	turquoise
Lc01031	Mtr_1g092860	yellow
Lc01033	Mtr_1g092540	turquoise
Lc01038	#N/A	turquoise
Lc01048	Mtr_1g069095	blue
Lc01053	Mtr_1g073740	turquoise
Lc01054	Mtr_1g044520	blue
Lc01056	Mtr_1g088970	blue
Lc01060	Mtr_1g075153	blue
Lc01064	Mtr_1g069630	blue
Lc01066	Mtr_1g069610	blue
Lc01071	Mtr_1g059760	turquoise
Lc01073	Mtr_1g082770	blue
Lc01077	Mtr_1g069440	turquoise
Lc01087	Mtr_1g072780	turquoise
Lc01088	Mtr_1g072790	blue
Lc01095	Mtr_1g026760	turquoise
Lc01096	Mtr_1g026810	blue
Lc01097	Mtr_1g026820	turquoise
Lc01098	Mtr_1g026840	turquoise
Lc01102	Mtr_1g100787	blue
Lc01112	Mtr_1g056890	blue
Lc01113	Mtr_1g071260	turquoise
Lc01115	Mtr_7g029385	turquoise
Lc01122	Mtr_1g100633	blue
Lc01123	Mtr_1g007150	turquoise
Lc01127	Mtr_1g107235	turquoise
Lc01128	Mtr_1g107215	turquoise
Lc01132	#N/A	blue
Lc01136	Mtr_1g053955	turquoise
Lc01139	Mtr_1g105305	blue
Lc01140	Mtr_1g105290	blue
Lc01144	#N/A	turquoise
Lc01151	Mtr_1g093090	yellow
Lc01152	Mtr_1g093100	yellow
Lc01154	Mtr_1g076170	yellow
Lc01155	Mtr_1g106550	blue
Lc01156	Mtr_1g100130	blue
Lc01157	Mtr_1g107540	turquoise
Lc01158	Mtr_1g107535	blue
Lc01183	Mtr_1g009850	blue
Lc01187	Mtr_1g103530	yellow
Lc01189	Mtr_1g069855	blue
Lc01200	Mtr_1g090230	blue
Lc01212	Mtr_1g089600	turquoise
Lc01213	#N/A	blue
Lc01215	Mtr_1g083420	yellow
Lc01235	Mtr_0004s0220	blue
Lc01236	Mtr_1g066920	turquoise
Lc01242	Mtr_1g114290	turquoise
Lc01246	Mtr_1g114190	turquoise
Lc01254	Mtr_1g114010	yellow
Lc01255	Mtr_1g442840	blue
Lc01256	Mtr_0017s0230	turquoise
Lc01258	Mtr_1g073340	blue
Lc01260	Mtr_1g069190	blue
Lc01263	Mtr_1g084740	yellow
Lc01268	Mtr_1g095510	yellow
Lc01273	Mtr_1g049120	turquoise
Lc01285	Mtr_1g101910	blue
Lc01287	Mtr_1g081270	turquoise
Lc01292	#N/A	blue
Lc01293	Mtr_1g080330	turquoise
Lc01294	Mtr_0017s0230	turquoise
Lc01303	Mtr_0506s0040	blue
Lc01304	Mtr_1g067140	yellow
Lc01308	Mtr_1g043190	turquoise
Lc01309	Mtr_1g102160	yellow
Lc01322	Mtr_1g037570	turquoise
Lc01326	Mtr_1g047130	blue
Lc01335	Mtr_5g094700	turquoise
Lc01341	Mtr_3g056705	turquoise
Lc01345	Mtr_1g050425	turquoise
Lc01350	Mtr_5g095470	turquoise
Lc01353	Mtr_1g107490	turquoise
Lc01362	#N/A	blue
Lc01364	Mtr_1g056180	turquoise
Lc01366	Mtr_1g098390	blue
Lc01367	Mtr_1g073660	blue
Lc01368	Mtr_1g073670	blue
Lc01374	Mtr_1g115475	blue
Lc01379	Mtr_1g115430	turquoise
Lc01384	Mtr_1g115385	turquoise
Lc01391	Mtr_1g084610	turquoise
Lc01393	Mtr_1g084620	blue
Lc01396	Mtr_1g060010	blue
Lc01399	Mtr_1g111550	yellow
Lc01400	Mtr_1g013680	yellow
Lc01404	Mtr_1g076310	turquoise
Lc01410	Mtr_1g026510	yellow
Lc01414	Mtr_1g054315	yellow
Lc01415	Mtr_1g077420	blue
Lc01416	Mtr_1g077430	blue
Lc01425	Mtr_1g102010	yellow
Lc01429	#N/A	blue
Lc01435	Mtr_1g054670	blue
Lc01443	Mtr_1g100810	turquoise
Lc01447	Mtr_1g088925	turquoise
Lc01448	Mtr_1g105970	blue
Lc01450	Mtr_1g105965	blue
Lc01453	Mtr_1g090930	blue
Lc01457	Mtr_1g106940	turquoise
Lc01460	Mtr_1g075330	turquoise
Lc01473	Mtr_1g072650	turquoise
Lc01474	Mtr_1g109320	turquoise
Lc01477	Mtr_1g109380	turquoise
Lc01478	Mtr_1g051055	blue
Lc01484	Mtr_0006s0260	turquoise
Lc01489	#N/A	yellow
Lc01493	Mtr_5g098060	blue
Lc01500	Mtr_5g097870	turquoise
Lc01501	Mtr_5g097580	blue
Lc01503	Mtr_5g097510	yellow
Lc01504	Mtr_5g097490	turquoise
Lc01505	Mtr_5g097480	turquoise
Lc01508	Mtr_5g097360	turquoise
Lc01513	Mtr_5g097280	turquoise
Lc01525	Mtr_5g097080	blue
Lc01528	Mtr_5g097010	turquoise
Lc01533	Mtr_1g115950	turquoise
Lc01534	Mtr_1g069215	yellow
Lc01536	Mtr_1g115940	turquoise
Lc01541	Mtr_1g054285	blue
Lc01545	Mtr_1g056550	turquoise
Lc01552	Mtr_1g097890	blue
Lc01553	Mtr_1g104540	blue
Lc01558	Mtr_1g054305	turquoise
Lc01563	Mtr_1g061170	blue
Lc01564	Mtr_1g061160	blue
Lc01568	Mtr_1g090720	turquoise
Lc01572	Mtr_0194s0020	blue
Lc01573	Mtr_2g034520	blue
Lc01581	Mtr_1g096050	turquoise
Lc01583	Mtr_4g032895	turquoise
Lc01585	Mtr_1g109230	turquoise
Lc01591	Mtr_7g021670	turquoise
Lc01592	Mtr_1g106815	yellow
Lc01611	Mtr_1g041275	blue
Lc01612	Mtr_1g041285	turquoise
Lc01617	Mtr_1g108765	blue
Lc01620	Mtr_1g048630	blue
Lc01631	Mtr_1g098650	blue
Lc01635	Mtr_0094s0010	blue
Lc01636	Mtr_1g035690	turquoise
Lc01637	Mtr_1g087200	turquoise
Lc01638	Mtr_1g105940	turquoise
Lc01648	Mtr_1g076710	turquoise
Lc01649	Mtr_1g076700	blue
Lc01653	Mtr_1g105650	turquoise
Lc01654	Mtr_1g105650	turquoise
Lc01656	Mtr_1g081850	blue
Lc01661	#N/A	turquoise
Lc01662	Mtr_1g075610	blue
Lc01663	Mtr_1g063380	turquoise
Lc01665	Mtr_1g068970	turquoise
Lc01666	Mtr_1g098920	blue
Lc01668	Mtr_1g110870	turquoise
Lc01672	#N/A	blue
Lc01679	Mtr_1g086310	yellow
Lc01683	Mtr_1g086230	yellow
Lc01684	Mtr_1g041695	blue
Lc01685	Mtr_1g041685	blue
Lc01694	Mtr_1g066800	blue
Lc01700	Mtr_0182s0060	blue
Lc01701	Mtr_1g072380	turquoise
Lc01702	Mtr_1g089500	blue
Lc01704	Mtr_1g093980	blue
Lc01724	Mtr_1g102720	yellow
Lc01735	Mtr_1g007630	turquoise
Lc01740	Mtr_1g029630	blue
Lc01761	Mtr_1g094000	blue
Lc01764	Mtr_4g084280	turquoise
Lc01766	Mtr_1g117130	blue
Lc01772	Mtr_1g047250	blue
Lc01773	Mtr_1g047210	yellow
Lc01775	Mtr_1g101390	yellow
Lc01785	Mtr_1g046510	turquoise
Lc01789	Mtr_1g090920	turquoise
Lc01802	Mtr_3g094230	blue
Lc01803	Mtr_1g090670	blue
Lc01804	Mtr_1g090673	turquoise
Lc01805	Mtr_1g055425	yellow
Lc01809	Mtr_1g058350	turquoise
Lc01819	Mtr_1g090773	blue
Lc01820	Mtr_1g069320	turquoise
Lc01827	Mtr_1g032730	turquoise
Lc01828	Mtr_1g104850	turquoise
Lc01836	Mtr_0653s0030	blue
Lc01838	Mtr_1g073840	turquoise
Lc01842	Mtr_1g109430	yellow
Lc01852	Mtr_1g063060	blue
Lc01867	Mtr_1g097460	yellow
Lc01868	Mtr_1g108690	turquoise
Lc01872	Mtr_1g032850	blue
Lc01881	Mtr_1g104590	turquoise
Lc01889	Mtr_1g093240	blue
Lc01896	Mtr_1g046460	turquoise
Lc01899	Mtr_1g040105	blue
Lc01900	Mtr_1g115570	turquoise
Lc01901	Mtr_1g115575	turquoise
Lc01902	Mtr_1g035700	yellow
Lc01904	Mtr_1g077690	blue
Lc01908	Mtr_1g073930	blue
Lc01909	Mtr_1g073940	blue
Lc01912	Mtr_1g076810	yellow
Lc01915	#N/A	turquoise
Lc01918	Mtr_1g090913	blue
Lc01919	#N/A	turquoise
Lc01925	Mtr_1g116055	turquoise
Lc01927	Mtr_1g049370	blue
Lc01928	Mtr_1g053470	yellow
Lc01930	Mtr_1g083780	yellow
Lc01934	Mtr_1g072160	turquoise
Lc01940	Mtr_1g028090	turquoise
Lc01941	Mtr_1g028080	turquoise
Lc01943	Mtr_1g116230	blue
Lc01945	Mtr_1g116205	turquoise
Lc01954	Mtr_5g096420	turquoise
Lc01956	Mtr_5g096470	turquoise
Lc01959	Mtr_5g096560	turquoise
Lc01969	Mtr_1g109120	turquoise
Lc01975	Mtr_1g064060	blue
Lc01977	Mtr_1g088750	turquoise
Lc01980	Mtr_1g106215	turquoise
Lc01991	Mtr_1g007170	blue
Lc01992	Mtr_4g083960	yellow
Lc01993	Mtr_1g030860	blue
Lc01996	Mtr_1g090340	turquoise
Lc01998	Mtr_1g054450	blue
Lc02002	Mtr_3g462990	turquoise
Lc02004	Mtr_1g075680	blue
Lc02012	Mtr_1g041405	turquoise
Lc02013	Mtr_1g041410	yellow
Lc02030	Mtr_1g084040	yellow
Lc02036	#N/A	blue
Lc02037	Mtr_1g084820	blue
Lc02042	Mtr_1g032430	turquoise
Lc02043	Mtr_1g099110	turquoise
Lc02050	Mtr_1g101330	turquoise
Lc02056	Mtr_1g090683	turquoise
Lc02078	Mtr_1g100315	turquoise
Lc02082	Mtr_1g062930	blue
Lc02084	Mtr_1g082660	yellow
Lc02087	Mtr_1g088660	turquoise
Lc02089	Mtr_1g088680	turquoise
Lc02091	Mtr_1g088700	blue
Lc02094	Mtr_1g088730	turquoise
Lc02098	Mtr_1g069325	turquoise
Lc02101	Mtr_1g076150	turquoise
Lc02107	Mtr_1g050432	blue
Lc02108	Mtr_1g050448	blue
Lc02112	Mtr_1g492930	blue
Lc02121	Mtr_1g116110	yellow
Lc02124	Mtr_1g107500	turquoise
Lc02148	#N/A	turquoise
Lc02150	Mtr_1g101250	turquoise
Lc02151	Mtr_1g101250	turquoise
Lc02161	Mtr_1g077750	blue
Lc02163	Mtr_1g077800	turquoise
Lc02165	Mtr_5g041700	turquoise
Lc02173	Mtr_1g105020	turquoise
Lc02177	Mtr_1g035330	turquoise
Lc02184	#N/A	blue
Lc02187	Mtr_0878s0020	blue
Lc02193	Mtr_1g098640	turquoise
Lc02197	Mtr_1g031720	turquoise
Lc02204	Mtr_1g076290	turquoise
Lc02207	Mtr_1g077550	turquoise
Lc02210	Mtr_1g050520	blue
Lc02211	Mtr_1g073360	turquoise
Lc02212	Mtr_1g032950	blue
Lc02219	Mtr_1g059270	blue
Lc02221	Mtr_1g106735	blue
Lc02224	Mtr_1g031930	turquoise
Lc02235	Mtr_1g115820	turquoise
Lc02240	Mtr_1g484850	yellow
Lc02249	#N/A	yellow
Lc02260	Mtr_1g046740	turquoise
Lc02275	Mtr_1g082920	blue
Lc02276	Mtr_1g082940	blue
Lc02277	Mtr_1g082950	turquoise
Lc02280	Mtr_1g083020	blue
Lc02286	Mtr_1g071110	turquoise
Lc02287	Mtr_1g070370	yellow
Lc02297	Mtr_1g029840	turquoise
Lc02301	Mtr_1g006490	blue
Lc02303	#N/A	turquoise
Lc02311	Mtr_1g103730	turquoise
Lc02314	Mtr_1g097250	blue
Lc02317	Mtr_1g084190	turquoise
Lc02319	Mtr_1g072620	turquoise
Lc02322	#N/A	blue
Lc02323	Mtr_1g069355	turquoise
Lc02325	Mtr_1g096450	yellow
Lc02326	Mtr_1g096460	turquoise
Lc02327	Mtr_1g096490	blue
Lc02333	Mtr_1g080770	blue
Lc02342	Mtr_0305s0020	blue
Lc02358	Mtr_1g069785	blue
Lc02360	Mtr_1g069765	blue
Lc02361	Mtr_1g069755	turquoise
Lc02373	Mtr_1g105495	blue
Lc02374	Mtr_1g037310	turquoise
Lc02376	Mtr_1g073610	blue
Lc02383	Mtr_1g076130	blue
Lc02387	Mtr_1g060120	blue
Lc02389	Mtr_1g492730	turquoise
Lc02390	Mtr_1g492760	turquoise
Lc02393	Mtr_1g095110	blue
Lc02399	Mtr_1g107485	turquoise
Lc02400	Mtr_1g107490	turquoise
Lc02402	Mtr_1g064710	turquoise
Lc02404	Mtr_1g041085	blue
Lc02405	Mtr_1g082470	turquoise
Lc02408	Mtr_1g079800	blue
Lc02413	Mtr_1g031650	turquoise
Lc02428	Mtr_0012s0090	turquoise
Lc02432	Mtr_1g073320	blue
Lc02433	Mtr_1g052165	yellow
Lc02434	Mtr_1g102420	yellow
Lc02439	Mtr_1g115260	turquoise
Lc02440	Mtr_1g115255	turquoise
Lc02442	Mtr_1g115230	blue
Lc02444	Mtr_1g115220	blue
Lc02445	Mtr_1g115225	blue
Lc02446	Mtr_1g115195	turquoise
Lc02447	Mtr_1g072560	turquoise
Lc02448	#N/A	blue
Lc02452	#N/A	blue
Lc02453	Mtr_1g114380	blue
Lc02457	Mtr_1g041345	blue
Lc02459	Mtr_1g085560	turquoise
Lc02461	Mtr_1g085550	yellow
Lc02462	Mtr_1g085530	turquoise
Lc02463	Mtr_1g085500	blue
Lc02464	Mtr_1g031890	blue
Lc02465	Mtr_1g100727	turquoise
Lc02467	Mtr_3g073140	blue
Lc02468	Mtr_1g053520	turquoise
Lc02472	Mtr_1g047670	turquoise
Lc02475	Mtr_1g085620	blue
Lc02481	Mtr_1g110180	turquoise
Lc02483	Mtr_1g108910	turquoise
Lc02484	Mtr_1g108890	blue
Lc02485	Mtr_1g110230	turquoise
Lc02491	Mtr_0350s0010	blue
Lc02492	Mtr_1g031140	blue
Lc02493	Mtr_1g031110	blue
Lc02494	Mtr_1g030890	blue
Lc02499	Mtr_1g041380	yellow
Lc02500	Mtr_1g062190	blue
Lc02506	Mtr_1g088420	turquoise
Lc02507	Mtr_1g088410	blue
Lc02515	Mtr_1g007860	turquoise
Lc02523	Mtr_1g048990	blue
Lc02528	Mtr_1g105755	turquoise
Lc02533	Mtr_1g115840	blue
Lc02536	Mtr_1g115920	turquoise
Lc02539	Mtr_1g115790	turquoise
Lc02548	Mtr_1g054675	turquoise
Lc02550	Mtr_1g094115	turquoise
Lc02551	Mtr_1g100643	turquoise
Lc02554	Mtr_1g098700	turquoise
Lc02555	Mtr_1g105930	turquoise
Lc02556	Mtr_1g044125	yellow
Lc02566	Mtr_1g054935	blue
Lc02569	Mtr_1g088610	turquoise
Lc02582	Mtr_1g102540	yellow
Lc02587	Mtr_3g106820	turquoise
Lc02588	Mtr_1g089370	turquoise
Lc02589	Mtr_1g089180	turquoise
Lc02594	Mtr_5g079980	turquoise
Lc02601	Mtr_1g069235	turquoise
Lc02604	Mtr_1g069240	turquoise
Lc02606	Mtr_1g069255	turquoise
Lc02609	Mtr_1g048610	turquoise
Lc02614	Mtr_1g099800	turquoise
Lc02616	Mtr_1g082570	turquoise
Lc02617	Mtr_1g082580	blue
Lc02621	Mtr_1g100587	turquoise
Lc02625	Mtr_1g079790	turquoise
Lc02627	Mtr_1g492640	turquoise
Lc02628	#N/A	yellow
Lc02629	Mtr_1g092570	turquoise
Lc02630	Mtr_1g090690	turquoise
Lc02633	Mtr_1g034170	blue
Lc02637	Mtr_1g106430	blue
Lc02638	Mtr_1g030660	turquoise
Lc02640	Mtr_1g026920	blue
Lc02643	#N/A	turquoise
Lc02644	Mtr_5g094160	turquoise
Lc02648	Mtr_5g094130	yellow
Lc02649	Mtr_1g099320	turquoise
Lc02651	Mtr_5g063620	blue
Lc02652	Mtr_1g043050	turquoise
Lc02657	Mtr_1g046210	yellow
Lc02658	Mtr_1g078090	yellow
Lc02659	Mtr_1g078100	turquoise
Lc02666	Mtr_1g050502	yellow
Lc02675	Mtr_1g032140	turquoise
Lc02678	Mtr_1g103570	yellow
Lc02681	Mtr_1g069960	turquoise
Lc02682	Mtr_1g064540	blue
Lc02683	Mtr_1g051895	turquoise
Lc02688	Mtr_1g095360	turquoise
Lc02697	Mtr_1g105090	turquoise
Lc02701	Mtr_1g053065	turquoise
Lc02715	#N/A	turquoise
Lc02719	Mtr_1g060380	yellow
Lc02724	#N/A	blue
Lc02726	Mtr_1g043050	turquoise
Lc02728	Mtr_1g053960	yellow
Lc02730	Mtr_1g063170	blue
Lc02731	Mtr_1g063110	turquoise
Lc02734	#N/A	blue
Lc02737	Mtr_1g108460	turquoise
Lc02738	Mtr_1g062090	turquoise
Lc02752	Mtr_1g080250	blue
Lc02770	Mtr_1g090723	turquoise
Lc02782	Mtr_1g044120	blue
Lc02784	Mtr_1g075800	turquoise
Lc02785	Mtr_1g060790	blue
Lc02789	Mtr_1g026680	blue
Lc02798	Mtr_1g093960	turquoise
Lc02801	Mtr_1g100090	turquoise
Lc02805	Mtr_1g028580	blue
Lc02810	Mtr_1g027680	turquoise
Lc02813	Mtr_1g069845	blue
Lc02814	Mtr_1g007800	blue
Lc02815	Mtr_1g007740	turquoise
Lc02823	Mtr_1g080700	blue
Lc02824	Mtr_1g080690	blue
Lc02825	Mtr_1g089280	blue
Lc02826	Mtr_1g089290	turquoise
Lc02831	Mtr_1g097850	turquoise
Lc02833	Mtr_1g106730	turquoise
Lc02836	Mtr_1g075530	yellow
Lc02838	Mtr_1g077740	turquoise
Lc02841	Mtr_1g039400	turquoise
Lc02845	Mtr_1g095830	blue
Lc02847	Mtr_1g103260	blue
Lc02849	Mtr_1g098240	blue
Lc02862	Mtr_1g080890	turquoise
Lc02863	Mtr_1g103870	turquoise
Lc02869	Mtr_1g090620	turquoise
Lc02874	Mtr_7g109520	turquoise
Lc02875	Mtr_1g110350	turquoise
Lc02882	Mtr_1g012540	blue
Lc02883	Mtr_1g095620	blue
Lc02889	Mtr_1g090130	blue
Lc02898	Mtr_1g050322	turquoise
Lc02906	Mtr_0004s0600	turquoise
Lc02907	Mtr_1g051230	blue
Lc02913	Mtr_1g058120	blue
Lc02917	Mtr_0249s0070	yellow
Lc02921	#N/A	yellow
Lc02930	Mtr_1g090780	blue
Lc02932	Mtr_1g116500	blue
Lc02940	Mtr_1g096880	turquoise
Lc02946	Mtr_1g037580	turquoise
Lc02947	Mtr_1g088760	turquoise
Lc02960	Mtr_1g093080	turquoise
Lc02978	Mtr_0015s0140	turquoise
Lc02979	Mtr_0015s0130	blue
Lc02981	Mtr_1g087290	blue
Lc02983	Mtr_5g095510	blue
Lc02984	Mtr_5g095530	blue
Lc02986	Mtr_5g095650	turquoise
Lc02987	Mtr_5g095660	blue
Lc02988	Mtr_5g095670	turquoise
Lc02990	Mtr_5g095700	blue
Lc02992	Mtr_7g091410	turquoise
Lc02993	Mtr_5g095720	turquoise
Lc02995	Mtr_5g095770	turquoise
Lc03000	Mtr_5g095140	blue
Lc03001	Mtr_5g096030	yellow
Lc03006	Mtr_5g096150	turquoise
Lc03011	Mtr_5g096260	yellow
Lc03012	Mtr_1g086950	blue
Lc03020	Mtr_1g034000	blue
Lc03024	Mtr_1g054455	yellow
Lc03026	Mtr_1g096910	blue
Lc03044	#N/A	turquoise
Lc03048	Mtr_1g112080	yellow
Lc03050	Mtr_1g112020	blue
Lc03052	Mtr_1g111980	blue
Lc03054	Mtr_1g111960	turquoise
Lc03055	Mtr_1g111910	blue
Lc03056	Mtr_1g111900	blue
Lc03057	Mtr_1g111890	yellow
Lc03059	Mtr_1g111860	yellow
Lc03063	Mtr_3g027280	blue
Lc03068	Mtr_1g110270	blue
Lc03069	Mtr_1g108890	turquoise
Lc03071	Mtr_1g074930	yellow
Lc03084	Mtr_1g047800	turquoise
Lc03085	Mtr_1g047790	blue
Lc03094	Mtr_1g097110	turquoise
Lc03095	Mtr_1g097140	turquoise
Lc03096	Mtr_1g097160	blue
Lc03099	Mtr_1g053900	yellow
Lc03100	Mtr_1g032580	turquoise
Lc03101	Mtr_1g029450	yellow
Lc03104	Mtr_1g013680	yellow
Lc03105	Mtr_1g100820	turquoise
Lc03107	Mtr_3g112050	turquoise
Lc03108	Mtr_1g106095	yellow
Lc03110	#N/A	turquoise
Lc03111	Mtr_1g040360	blue
Lc03121	#N/A	blue
Lc03128	Mtr_1g040195	yellow
Lc03132	Mtr_4g113750	turquoise
Lc03133	Mtr_1g059830	turquoise
Lc03134	Mtr_1g101680	yellow
Lc03135	Mtr_1g069860	blue
Lc03147	Mtr_1g105730	turquoise
Lc03156	Mtr_1g035010	turquoise
Lc03170	Mtr_1g045750	yellow
Lc03182	Mtr_1g033500	blue
Lc03185	Mtr_1g055325	turquoise
Lc03192	Mtr_1g114590	blue
Lc03193	Mtr_1g114560	turquoise
Lc03196	#N/A	blue
Lc03201	Mtr_1g045120	blue
Lc03206	Mtr_1g076210	turquoise
Lc03213	Mtr_7g066880	turquoise
Lc03218	Mtr_1g101280	blue
Lc03220	Mtr_1g070520	blue
Lc03222	Mtr_1395s0010	blue
Lc03224	Mtr_1395s0010	turquoise
Lc03226	Mtr_1g079950	yellow
Lc03227	Mtr_1g080020	turquoise
Lc03228	#N/A	blue
Lc03232	Mtr_1g062410	turquoise
Lc03234	Mtr_1g035090	blue
Lc03260	Mtr_1g080760	blue
Lc03263	Mtr_1g007905	turquoise
Lc03266	Mtr_1g110750	turquoise
Lc03267	Mtr_1g110760	blue
Lc03268	Mtr_1g110790	blue
Lc03276	Mtr_1g108990	turquoise
Lc03278	#N/A	turquoise
Lc03281	#N/A	blue
Lc03282	#N/A	blue
Lc03292	Mtr_1g071470	turquoise
Lc03295	Mtr_1g094720	turquoise
Lc03296	Mtr_1g094730	turquoise
Lc03297	Mtr_0427s0010	turquoise
Lc03298	Mtr_1g093770	turquoise
Lc03303	Mtr_1g007180	blue
Lc03304	Mtr_1g032010	turquoise
Lc03305	Mtr_1g041385	blue
Lc03310	Mtr_1g112660	turquoise
Lc03317	Mtr_1g032570	turquoise
Lc03321	Mtr_1g104650	blue
Lc03323	Mtr_1g089310	yellow
Lc03326	Mtr_1g029750	turquoise
Lc03336	Mtr_1g036280	blue
Lc03344	Mtr_1g058100	yellow
Lc03345	Mtr_1g102350	blue
Lc03350	Mtr_1g106020	blue
Lc03351	Mtr_1g080150	turquoise
Lc03359	Mtr_1g107555	turquoise
Lc03360	Mtr_1g090310	blue
Lc03363	Mtr_1g050530	turquoise
Lc03365	Mtr_1g007060	blue
Lc03369	Mtr_1g071400	blue
Lc03371	Mtr_1g067050	yellow
Lc03372	Mtr_1g053910	yellow
Lc03379	Mtr_1g090640	blue
Lc03381	Mtr_1g050528	turquoise
Lc03389	Mtr_1g029440	yellow
Lc03394	Mtr_1g100647	blue
Lc03401	Mtr_1g105110	blue
Lc03411	Mtr_1g057560	blue
Lc03415	Mtr_1g067630	blue
Lc03417	Mtr_1g067600	blue
Lc03427	Mtr_1g116820	blue
Lc03428	Mtr_1g116810	turquoise
Lc03431	Mtr_1g069140	blue
Lc03432	Mtr_1g045550	yellow
Lc03434	Mtr_1g035490	turquoise
Lc03435	Mtr_1g089760	turquoise
Lc03437	Mtr_1g012335	blue
Lc03441	Mtr_5g094610	turquoise
Lc03442	Mtr_5g094600	turquoise
Lc03448	Mtr_5g094450	turquoise
Lc03450	Mtr_4g078505	turquoise
Lc03451	Mtr_0535s0060	turquoise
Lc03453	Mtr_5g094400	turquoise
Lc03454	Mtr_5g094390	turquoise
Lc03461	Mtr_1g050535	turquoise
Lc03464	Mtr_1g034210	yellow
Lc03465	Mtr_1g106030	yellow
Lc03470	Mtr_1g074880	turquoise
Lc03472	Mtr_1g112870	blue
Lc03477	Mtr_6g086025	turquoise
Lc03482	Mtr_4g008640	turquoise
Lc03490	Mtr_1g116260	turquoise
Lc03491	Mtr_1g116240	blue
Lc03495	Mtr_1g090490	turquoise
Lc03498	Mtr_1g047990	blue
Lc03499	Mtr_1g057150	blue
Lc03512	Mtr_1g072300	turquoise
Lc03519	Mtr_1g042700	turquoise
Lc03525	Mtr_4g094660	turquoise
Lc03526	Mtr_1g080370	turquoise
Lc03533	Mtr_1g106775	yellow
Lc03543	Mtr_1g083960	blue
Lc03544	Mtr_0017s0230	turquoise
Lc03548	Mtr_1g101945	blue
Lc03549	Mtr_0046s0180	yellow
Lc03555	Mtr_1g106905	turquoise
Lc03559	Mtr_1g106755	yellow
Lc03563	Mtr_1g107045	yellow
Lc03565	Mtr_1g107085	blue
Lc03566	Mtr_1g107135	blue
Lc03575	Mtr_1g026860	turquoise
Lc03583	Mtr_1g106755	yellow
Lc03593	Mtr_0236s0050	turquoise
Lc03594	Mtr_1g109390	turquoise
Lc03596	Mtr_1g050550	turquoise
Lc03599	Mtr_1g084990	turquoise
Lc03600	Mtr_1g073890	turquoise
Lc03601	Mtr_1g071780	turquoise
Lc03606	Mtr_1g040460	turquoise
Lc03612	Mtr_1g061190	turquoise
Lc03616	Mtr_1g095600	yellow
Lc03618	Mtr_1g095570	turquoise
Lc03620	Mtr_1g041815	turquoise
Lc03623	Mtr_8g079060	blue
Lc03626	Mtr_1g081620	blue
Lc03637	Mtr_1g041465	blue
Lc03638	Mtr_1g041475	turquoise
Lc03639	Mtr_1g049180	blue
Lc03642	Mtr_1g110690	turquoise
Lc03648	Mtr_1g115215	turquoise
Lc03651	Mtr_0710s0020	turquoise
Lc03653	Mtr_1g115135	blue
Lc03656	Mtr_1g115185	turquoise
Lc03670	Mtr_1g114600	turquoise
Lc03671	Mtr_1g054625	turquoise
Lc03676	Mtr_1g082840	blue
Lc03678	Mtr_1g110430	turquoise
Lc03680	Mtr_1g110490	turquoise
Lc03693	Mtr_1g076990	turquoise
Lc03699	Mtr_1g100697	turquoise
Lc03701	Mtr_1g050545	turquoise
Lc03715	Mtr_1g041395	blue
Lc03716	Mtr_1g079400	blue
Lc03722	Mtr_1g115535	turquoise
Lc03726	Mtr_1g115500	blue
Lc03730	Mtr_3g104980	turquoise
Lc03739	Mtr_1g007600	turquoise
Lc03740	Mtr_1g007590	turquoise
Lc03752	Mtr_1g079830	turquoise
Lc03756	Mtr_1g032600	blue
Lc03771	Mtr_1g038260	blue
Lc03779	Mtr_1g086340	turquoise
Lc03780	Mtr_1g086340	turquoise
Lc03783	Mtr_1g099810	turquoise
Lc03784	Mtr_1g099815	turquoise
Lc03786	#N/A	turquoise
Lc03797	Mtr_6g043510	turquoise
Lc03802	Mtr_1g029850	turquoise
Lc03808	Mtr_1g031200	blue
Lc03810	Mtr_1g031150	turquoise
Lc03811	Mtr_1g099490	turquoise
Lc03812	Mtr_1g028310	turquoise
Lc03813	Mtr_1g028310	blue
Lc03816	Mtr_1g044560	blue
Lc03818	Mtr_1g103660	turquoise
Lc03823	Mtr_1g096780	yellow
Lc03830	Mtr_1g095920	blue
Lc03832	Mtr_1g095880	turquoise
Lc03839	Mtr_1g064260	turquoise
Lc03846	Mtr_1g090380	blue
Lc03848	Mtr_1g030760	yellow
Lc03857	Mtr_1g097600	blue
Lc03859	Mtr_1g111350	blue
Lc03861	Mtr_1g111330	turquoise
Lc03864	Mtr_1g111280	yellow
Lc03872	#N/A	blue
Lc03873	Mtr_4g033400	turquoise
Lc03875	Mtr_1g038920	blue
Lc03876	#N/A	blue
Lc03879	Mtr_1g105430	blue
Lc03883	Mtr_1g068825	turquoise
Lc03884	Mtr_1g068600	blue
Lc03899	Mtr_1g061850	yellow
Lc03900	Mtr_1g043430	turquoise
Lc03904	#N/A	yellow
Lc03905	#N/A	yellow
Lc03907	Mtr_1g111580	blue
Lc03908	Mtr_1g111570	turquoise
Lc03910	Mtr_1g007610	turquoise
Lc03913	#N/A	blue
Lc03916	Mtr_1g046380	blue
Lc03928	Mtr_1g075170	blue
Lc03930	Mtr_1g111060	yellow
Lc03935	Mtr_2g021870	blue
Lc03936	Mtr_1g040725	turquoise
Lc03937	Mtr_0015s0110	turquoise
Lc03944	Mtr_1g084100	turquoise
Lc03951	Mtr_1g076550	yellow
Lc03953	Mtr_1g076540	blue
Lc03958	Mtr_0722s0010	turquoise
Lc03966	Mtr_1g099360	blue
Lc03970	Mtr_1g041495	yellow
Lc03973	Mtr_1g062740	turquoise
Lc03979	Mtr_1g051245	yellow
Lc03982	Mtr_1g102550	yellow
Lc03985	Mtr_1g033830	yellow
Lc03997	Mtr_1g031700	turquoise
Lc04005	Mtr_1g071100	blue
Lc04007	Mtr_1g032190	turquoise
Lc04012	Mtr_1g043040	turquoise
Lc04026	Mtr_1g081920	yellow
Lc04027	Mtr_1g081910	yellow
Lc04035	Mtr_0376s0030	turquoise
Lc04042	Mtr_0121s0010	blue
Lc04045	Mtr_1g052380	yellow
Lc04048	Mtr_1g116080	turquoise
Lc04049	Mtr_1g035360	blue
Lc04051	Mtr_1g101240	yellow
Lc04055	Mtr_1g106030	yellow
Lc04057	Mtr_1g081790	turquoise
Lc04058	Mtr_1g081800	turquoise
Lc04060	Mtr_1g081840	blue
Lc04065	Mtr_0374s0050	turquoise
Lc04067	Mtr_1g067530	turquoise
Lc04074	Mtr_1g111390	yellow
Lc04075	Mtr_1g111400	blue
Lc04081	Mtr_1g067560	blue
Lc04098	Mtr_1g029620	blue
Lc04099	Mtr_1g029600	turquoise
Lc04105	Mtr_1g072510	yellow
Lc04111	Mtr_1g034300	turquoise
Lc04120	Mtr_1g094155	blue
Lc04121	Mtr_1g094145	blue
Lc04122	Mtr_1g035230	blue
Lc04123	#N/A	turquoise
Lc04124	Mtr_1g070970	turquoise
Lc04126	Mtr_1g072260	turquoise
Lc04129	Mtr_1g102880	yellow
Lc04140	Mtr_1g035130	turquoise
Lc04144	Mtr_1g063210	turquoise
Lc04146	Mtr_5g042440	turquoise
Lc04147	Mtr_1g102500	blue
Lc04155	Mtr_1g090657	blue
Lc04160	Mtr_1g085140	blue
Lc04161	Mtr_1g085130	blue
Lc04166	Mtr_1g076720	yellow
Lc04175	Mtr_1g062350	turquoise
Lc04181	Mtr_1g034490	blue
Lc04183	Mtr_1g099800	turquoise
Lc04191	Mtr_1g085640	blue
Lc04202	Mtr_1g093600	turquoise
Lc04208	Mtr_1663s0010	turquoise
Lc04209	Mtr_1g097400	yellow
Lc04224	Mtr_1g056910	turquoise
Lc04225	Mtr_1g086600	blue
Lc04226	Mtr_1g098580	blue
Lc04227	Mtr_1g098590	turquoise
Lc04230	Mtr_1g071070	blue
Lc04235	Mtr_1g089110	turquoise
Lc04236	Mtr_1g089130	turquoise
Lc04242	Mtr_1g032470	turquoise
Lc04243	Mtr_0017s0230	turquoise
Lc04247	Mtr_1g038470	blue
Lc04250	Mtr_1g060890	blue
Lc04253	#N/A	blue
Lc04259	Mtr_1g078400	turquoise
Lc04264	Mtr_1g026510	yellow
Lc04266	Mtr_1g081230	blue
Lc04267	Mtr_1g081230	yellow
Lc04268	#N/A	turquoise
Lc04273	Mtr_1g071360	turquoise
Lc04275	Mtr_1g104820	turquoise
Lc04276	Mtr_1g104800	turquoise
Lc04288	Mtr_1g086870	blue
Lc04289	Mtr_1g086840	blue
Lc04291	Mtr_1g086810	yellow
Lc04292	Mtr_1g079763	yellow
Lc04293	Mtr_1g079767	yellow
Lc04302	Mtr_1g106795	blue
Lc04319	Mtr_1g052110	blue
Lc04334	Mtr_1g046070	turquoise
Lc04339	Mtr_1g050462	turquoise
Lc04347	#N/A	turquoise
Lc04354	#N/A	turquoise
Lc04355	Mtr_1g080110	yellow
Lc04359	Mtr_1g070495	turquoise
Lc04360	Mtr_1g041290	blue
Lc04365	Mtr_1g027020	blue
Lc04366	Mtr_1g027020	blue
Lc04379	Mtr_1g069640	yellow
Lc04381	#N/A	turquoise
Lc04388	Mtr_1g054630	turquoise
Lc04395	Mtr_1g072140	yellow
Lc04401	Mtr_8g077160	turquoise
Lc04406	Mtr_1g028380	turquoise
Lc04407	#N/A	yellow
Lc04410	Mtr_1g090693	yellow
Lc04411	Mtr_1g077690	blue
Lc04414	Mtr_1g059890	turquoise
Lc04430	Mtr_1g077580	blue
Lc04434	Mtr_1g021150	yellow
Lc04437	Mtr_1g088540	blue
Lc04438	Mtr_1g088580	yellow
Lc04450	Mtr_1g031280	turquoise
Lc04453	Mtr_1g022190	blue
Lc04459	Mtr_1g054665	turquoise
Lc04471	Mtr_1g087750	turquoise
Lc04473	Mtr_1g087775	blue
Lc04485	Mtr_1g073920	turquoise
Lc04489	Mtr_1g027710	turquoise
Lc04491	Mtr_1g027730	turquoise
Lc04494	Mtr_1g084760	yellow
Lc04500	Mtr_1g066770	yellow
Lc04504	#N/A	yellow
Lc04509	Mtr_8g090180	blue
Lc04510	Mtr_1g085730	turquoise
Lc04513	Mtr_1g069720	blue
Lc04514	Mtr_0019s0100	turquoise
Lc04521	Mtr_1g076470	blue
Lc04523	Mtr_1g076430	blue
Lc04524	Mtr_1g076400	turquoise
Lc04535	Mtr_8g102350	blue
Lc04539	Mtr_1g083600	turquoise
Lc04544	Mtr_3g070165	yellow
Lc04546	Mtr_1g088870	turquoise
Lc04552	Mtr_1g055080	turquoise
Lc04554	Mtr_3g084500	blue
Lc04555	Mtr_1g060590	turquoise
Lc04556	Mtr_1g031680	turquoise
Lc04557	Mtr_1g108890	blue
Lc04558	Mtr_1g110290	turquoise
Lc04565	Mtr_1g056560	turquoise
Lc04571	Mtr_1g086790	blue
Lc04590	Mtr_1g074990	yellow
Lc04596	Mtr_1g101630	turquoise
Lc04600	Mtr_1g098310	blue
Lc04602	Mtr_1g098280	turquoise
Lc04607	Mtr_1g080590	blue
Lc04608	Mtr_1g106855	turquoise
Lc04609	Mtr_3g019010	turquoise
Lc04612	Mtr_1g067570	blue
Lc04622	Mtr_0100s0160	turquoise
Lc04624	Mtr_1g061590	blue
Lc04625	Mtr_1g061600	turquoise
Lc04630	Mtr_2g090610	turquoise
Lc04646	Mtr_1g098790	turquoise
Lc04658	Mtr_1g071540	turquoise
Lc04661	Mtr_1g093900	blue
Lc04662	Mtr_1g034390	blue
Lc04663	Mtr_1g034480	blue
Lc04666	Mtr_1g040155	blue
Lc04667	Mtr_1g040145	turquoise
Lc04669	Mtr_1g105555	turquoise
Lc04670	Mtr_1g048970	turquoise
Lc04675	Mtr_1g047130	blue
Lc04677	Mtr_1g046580	turquoise
Lc04686	Mtr_1g061530	blue
Lc04688	Mtr_3g053710	turquoise
Lc04689	Mtr_1g093965	turquoise
Lc04692	Mtr_1g094185	turquoise
Lc04700	Mtr_1g093720	blue
Lc04701	Mtr_1g062880	blue
Lc04703	Mtr_1g089890	turquoise
Lc04718	Mtr_1g045370	turquoise
Lc04728	Mtr_1g084210	blue
Lc04729	Mtr_1g084200	yellow
Lc04733	Mtr_1g080310	blue
Lc04739	Mtr_1g083950	blue
Lc04740	Mtr_1g028370	turquoise
Lc04743	Mtr_1g028330	blue
Lc04744	#N/A	turquoise
Lc04755	Mtr_1g107450	turquoise
Lc04757	Mtr_0427s0010	turquoise
Lc04758	Mtr_1g062250	blue
Lc04763	Mtr_1g099270	turquoise
Lc04765	Mtr_1g090320	turquoise
Lc04769	Mtr_1g028020	turquoise
Lc04777	Mtr_4g036620	turquoise
Lc04778	Mtr_1g045670	blue
Lc04783	Mtr_1g106530	blue
Lc04784	Mtr_1g101790	blue
Lc04795	Mtr_1g059700	turquoise
Lc04798	Mtr_1g095070	turquoise
Lc04799	Mtr_1g071810	blue
Lc04807	Mtr_1g101830	blue
Lc04811	Mtr_1g100950	turquoise
Lc04813	Mtr_0022s0430	turquoise
Lc04817	Mtr_5g096890	turquoise
Lc04818	Mtr_5g096860	turquoise
Lc04828	Mtr_5g096660	blue
Lc04829	#N/A	blue
Lc04830	Mtr_5g094300	turquoise
Lc04831	Mtr_5g094290	blue
Lc04834	Mtr_5g094230	turquoise
Lc04842	Mtr_1g031780	turquoise
Lc04843	Mtr_1g031790	blue
Lc04846	Mtr_1g076920	yellow
Lc04852	Mtr_1g086170	blue
Lc04860	Mtr_1g111660	blue
Lc04866	Mtr_1g060990	blue
Lc04881	Mtr_1g083110	turquoise
Lc04888	Mtr_1g051155	turquoise
Lc04893	Mtr_1g032930	turquoise
Lc04895	Mtr_3g078170	blue
Lc04903	Mtr_1g094960	blue
Lc04909	#N/A	blue
Lc04910	Mtr_1g109620	blue
Lc04911	Mtr_1g109630	blue
Lc04913	Mtr_1g109660	yellow
Lc04915	Mtr_1g110070	turquoise
Lc04921	#N/A	blue
Lc04924	Mtr_1g075280	blue
Lc04926	Mtr_1g075190	turquoise
Lc04927	Mtr_1g075190	yellow
Lc04937	Mtr_0188s0020	turquoise
Lc04940	Mtr_1g112480	blue
Lc04954	Mtr_1g112210	blue
Lc04956	Mtr_1g112200	turquoise
Lc04957	Mtr_1g075870	blue
Lc04959	#N/A	turquoise
Lc04962	#N/A	blue
Lc04963	Mtr_1g107460	blue
Lc04966	Mtr_1g089850	turquoise
Lc04968	#N/A	blue
Lc04969	Mtr_1g063900	turquoise
Lc04976	Mtr_1g030060	yellow
Lc04981	Mtr_1g030290	blue
Lc04982	Mtr_1g094620	yellow
Lc04986	Mtr_1g081000	blue
Lc04990	Mtr_1g031220	turquoise
Lc04991	Mtr_1g031590	blue
Lc04993	Mtr_5g094310	blue
Lc04995	Mtr_1g031690	blue
Lc04998	Mtr_1g102870	yellow
Lc04999	Mtr_1g004990	blue
Lc05009	Mtr_1g063230	yellow
Lc05015	Mtr_0017s0230	turquoise
Lc05016	Mtr_1g106190	blue
Lc05029	Mtr_1g097570	blue
Lc05030	Mtr_1g068810	turquoise
Lc05035	Mtr_1g064430	blue
Lc05042	Mtr_1g111140	blue
Lc05045	Mtr_1g111100	turquoise
Lc05046	Mtr_1g111090	yellow
Lc05047	Mtr_1g080990	blue
Lc05053	Mtr_1g082360	turquoise
Lc05062	Mtr_1g069370	yellow
Lc05063	Mtr_1g069385	blue
Lc05075	Mtr_1g067170	yellow
Lc05081	Mtr_1g030420	yellow
Lc05086	Mtr_1g111840	yellow
Lc05087	Mtr_1g111830	turquoise
Lc05088	Mtr_1g069085	blue
Lc05089	Mtr_1g087880	blue
Lc05090	Mtr_1g087900	blue
Lc05093	#N/A	blue
Lc05095	Mtr_1g099440	turquoise
Lc05104	Mtr_1g105600	yellow
Lc05121	Mtr_1g097380	blue
Lc05123	Mtr_1g097300	blue
Lc05131	Mtr_1g102840	blue
Lc05136	Mtr_1g116330	turquoise
Lc05137	Mtr_1g116320	yellow
Lc05141	Mtr_1g072550	turquoise
Lc05143	Mtr_1g030580	turquoise
Lc05145	Mtr_1g052685	turquoise
Lc05157	Mtr_2g069350	turquoise
Lc05159	Mtr_2g069340	turquoise
Lc05167	Mtr_2g014990	blue
Lc05173	Mtr_2g014920	turquoise
Lc05175	Mtr_2g014900	yellow
Lc05177	Mtr_2g014890	blue
Lc05179	Mtr_5g090170	turquoise
Lc05185	Mtr_2g034065	blue
Lc05186	Mtr_2g435930	blue
Lc05193	Mtr_2g099040	turquoise
Lc05201	Mtr_2g098950	blue
Lc05202	Mtr_2g098920	blue
Lc05203	Mtr_2g098910	blue
Lc05205	Mtr_0288s0020	turquoise
Lc05215	Mtr_6g018930	turquoise
Lc05216	Mtr_0795s0020	turquoise
Lc05228	Mtr_2g079330	turquoise
Lc05230	Mtr_2g079310	turquoise
Lc05231	Mtr_2g079300	turquoise
Lc05232	Mtr_0274s0030	turquoise
Lc05235	Mtr_2g082780	turquoise
Lc05237	Mtr_2g082930	blue
Lc05240	Mtr_2g027780	blue
Lc05242	Mtr_2g027740	blue
Lc05249	Mtr_2g024060	yellow
Lc05252	Mtr_2g024120	turquoise
Lc05259	Mtr_2g028620	turquoise
Lc05260	Mtr_6g011380	yellow
Lc05266	Mtr_1g093060	blue
Lc05270	Mtr_0277s0020	blue
Lc05271	Mtr_2g063110	blue
Lc05277	Mtr_6g470960	blue
Lc05278	Mtr_6g075290	turquoise
Lc05282	Mtr_6g009510	turquoise
Lc05286	Mtr_4g071620	turquoise
Lc05289	Mtr_0151s0030	blue
Lc05291	#N/A	turquoise
Lc05303	Mtr_2g026080	turquoise
Lc05305	Mtr_2g026050	turquoise
Lc05312	Mtr_4g071680	turquoise
Lc05318	Mtr_2g462000	blue
Lc05319	Mtr_2g462000	turquoise
Lc05327	Mtr_2g093220	blue
Lc05332	Mtr_6g082000	turquoise
Lc05333	Mtr_6g012830	turquoise
Lc05335	Mtr_6g012860	turquoise
Lc05341	Mtr_2g041170	blue
Lc05346	Mtr_2g027360	turquoise
Lc05351	Mtr_6g069620	turquoise
Lc05356	Mtr_2g041550	turquoise
Lc05357	Mtr_6g015995	blue
Lc05358	Mtr_2g437920	turquoise
Lc05370	Mtr_6g084640	yellow
Lc05372	Mtr_6g007687	blue
Lc05375	Mtr_2g023320	blue
Lc05376	Mtr_1588s0010	turquoise
Lc05377	Mtr_2g023280	turquoise
Lc05382	Mtr_6g013690	turquoise
Lc05385	Mtr_2g094720	blue
Lc05386	Mtr_2g094810	turquoise
Lc05388	Mtr_2g094930	blue
Lc05389	Mtr_2g082570	blue
Lc05393	Mtr_2g035850	turquoise
Lc05394	Mtr_2g035840	turquoise
Lc05398	Mtr_8g066460	turquoise
Lc05403	Mtr_2g005600	turquoise
Lc05404	#N/A	turquoise
Lc05405	Mtr_0256s0060	blue
Lc05407	Mtr_2g005620	blue
Lc05408	Mtr_2g005690	blue
Lc05411	Mtr_2g005730	turquoise
Lc05414	Mtr_2g005810	blue
Lc05417	Mtr_1g021642	turquoise
Lc05422	Mtr_2g005930	turquoise
Lc05428	Mtr_4g052840	turquoise
Lc05431	Mtr_2g005900	blue
Lc05432	Mtr_2g006040	blue
Lc05436	Mtr_2g005450	turquoise
Lc05437	Mtr_2g005410	turquoise
Lc05438	Mtr_2g005350	blue
Lc05439	Mtr_2g005330	turquoise
Lc05448	Mtr_6g016380	blue
Lc05449	Mtr_6g016375	yellow
Lc05461	Mtr_6g088510	yellow
Lc05473	Mtr_2g087900	turquoise
Lc05483	Mtr_2g096180	turquoise
Lc05488	Mtr_2g015040	yellow
Lc05489	Mtr_2g015010	blue
Lc05491	Mtr_2g019345	blue
Lc05492	Mtr_2g019320	turquoise
Lc05496	Mtr_2g084895	blue
Lc05502	Mtr_6g022320	turquoise
Lc05506	Mtr_2g033880	blue
Lc05507	Mtr_2g016760	turquoise
Lc05508	Mtr_2g016740	blue
Lc05509	Mtr_6g027770	blue
Lc05514	Mtr_6g464120	turquoise
Lc05515	Mtr_2g090385	blue
Lc05516	Mtr_2g090390	turquoise
Lc05517	Mtr_5g007630	turquoise
Lc05530	Mtr_2g078630	turquoise
Lc05531	Mtr_2g078620	blue
Lc05532	Mtr_2g033830	blue
Lc05533	Mtr_2g100850	yellow
Lc05539	Mtr_5g067350	blue
Lc05543	Mtr_2g081155	blue
Lc05548	Mtr_2g435340	blue
Lc05550	Mtr_2g028620	yellow
Lc05554	Mtr_6g004730	turquoise
Lc05562	Mtr_2g080950	turquoise
Lc05569	Mtr_6g069420	turquoise
Lc05571	Mtr_2g029960	turquoise
Lc05580	Mtr_2g094160	turquoise
Lc05581	Mtr_0286s0010	blue
Lc05594	Mtr_2g082770	turquoise
Lc05596	Mtr_2g030530	turquoise
Lc05597	Mtr_2g030530	turquoise
Lc05604	Mtr_6g015880	blue
Lc05608	Mtr_6g083980	turquoise
Lc05612	Mtr_2g029730	yellow
Lc05625	Mtr_2g090635	turquoise
Lc05629	Mtr_6g011500	turquoise
Lc05635	#N/A	turquoise
Lc05644	Mtr_2g083510	turquoise
Lc05645	Mtr_2g083380	blue
Lc05647	Mtr_2g066110	turquoise
Lc05654	#N/A	yellow
Lc05658	Mtr_6g004930	turquoise
Lc05660	Mtr_1g052225	blue
Lc05662	Mtr_2g084985	blue
Lc05666	Mtr_2g061290	turquoise
Lc05673	Mtr_2g015690	blue
Lc05678	Mtr_0549s0010	turquoise
Lc05679	Mtr_0891s0010	blue
Lc05680	Mtr_2g031930	blue
Lc05681	Mtr_2g088460	yellow
Lc05687	Mtr_1g099150	turquoise
Lc05689	Mtr_2g075760	blue
Lc05693	Mtr_2g091225	yellow
Lc05699	Mtr_2g436750	blue
Lc05716	Mtr_0804s0020	blue
Lc05720	Mtr_2g037990	turquoise
Lc05722	Mtr_6g084580	turquoise
Lc05727	Mtr_2g039930	turquoise
Lc05728	Mtr_2g098160	yellow
Lc05729	Mtr_1g058050	yellow
Lc05735	Mtr_2g098250	blue
Lc05736	Mtr_2g078810	blue
Lc05740	Mtr_2g088770	blue
Lc05742	Mtr_2g096570	blue
Lc05749	Mtr_2g028830	turquoise
Lc05750	Mtr_3g045450	turquoise
Lc05753	Mtr_2g028870	turquoise
Lc05757	Mtr_2g033820	turquoise
Lc05761	Mtr_2g036510	yellow
Lc05767	Mtr_6g053290	turquoise
Lc05769	#N/A	turquoise
Lc05772	Mtr_6g090810	turquoise
Lc05780	Mtr_6g021740	blue
Lc05783	Mtr_1g064300	turquoise
Lc05791	Mtr_2g046550	turquoise
Lc05794	Mtr_6g084710	turquoise
Lc05805	Mtr_2g026550	blue
Lc05813	#N/A	yellow
Lc05820	Mtr_2g007830	blue
Lc05825	Mtr_2g007740	blue
Lc05826	Mtr_2g007770	turquoise
Lc05830	Mtr_6g006990	turquoise
Lc05831	Mtr_6g053720	yellow
Lc05835	Mtr_6g071465	blue
Lc05838	Mtr_0495s0010	blue
Lc05841	Mtr_2g055430	turquoise
Lc05842	Mtr_2g104990	yellow
Lc05845	Mtr_2g078030	blue
Lc05847	Mtr_2g016140	yellow
Lc05848	Mtr_2g062270	blue
Lc05849	Mtr_2g436100	turquoise
Lc05850	Mtr_2g099155	turquoise
Lc05854	Mtr_2g082090	turquoise
Lc05860	Mtr_2g105640	turquoise
Lc05869	Mtr_6g088665	turquoise
Lc05871	Mtr_6g006190	yellow
Lc05876	Mtr_6g003980	blue
Lc05877	Mtr_7g100410	turquoise
Lc05892	Mtr_4g131370	turquoise
Lc05901	Mtr_2g026635	turquoise
Lc05902	Mtr_2g026590	blue
Lc05905	#N/A	blue
Lc05907	Mtr_2g049640	turquoise
Lc05913	Mtr_6g460470	turquoise
Lc05914	Mtr_6g060500	blue
Lc05921	Mtr_2g013980	turquoise
Lc05925	Mtr_2g014360	blue
Lc05927	Mtr_2g014340	turquoise
Lc05930	Mtr_2g009500	blue
Lc05931	#N/A	turquoise
Lc05932	Mtr_2g009450	blue
Lc05935	Mtr_2g009340	blue
Lc05940	Mtr_2g009310	turquoise
Lc05942	Mtr_2g436870	blue
Lc05945	Mtr_6g060570	blue
Lc05946	Mtr_2g033860	turquoise
Lc05947	Mtr_2g043560	blue
Lc05950	#N/A	blue
Lc05951	Mtr_2g449780	blue
Lc05957	Mtr_2g090240	turquoise
Lc05962	Mtr_2g090250	blue
Lc05966	Mtr_2g435560	turquoise
Lc05968	Mtr_6g047590	blue
Lc05979	Mtr_2g090735	blue
Lc05985	Mtr_2g047875	blue
Lc05986	Mtr_2g047838	yellow
Lc05987	Mtr_6g015795	turquoise
Lc06008	Mtr_2g084245	blue
Lc06009	Mtr_6g016015	blue
Lc06024	Mtr_2g019020	turquoise
Lc06026	#N/A	turquoise
Lc06028	Mtr_2g087680	blue
Lc06031	Mtr_6g012460	yellow
Lc06032	Mtr_6g012450	blue
Lc06047	Mtr_8g077020	turquoise
Lc06049	Mtr_2g088570	blue
Lc06060	Mtr_2g022180	yellow
Lc06063	Mtr_2g011170	turquoise
Lc06065	Mtr_7g026200	turquoise
Lc06068	Mtr_2g072790	blue
Lc06072	Mtr_6g072710	blue
Lc06075	Mtr_2g031310	blue
Lc06077	Mtr_2g030380	blue
Lc06081	Mtr_2g030400	turquoise
Lc06089	Mtr_6g068970	turquoise
Lc06093	Mtr_2g449830	blue
Lc06095	Mtr_6g034795	turquoise
Lc06107	Mtr_2g042970	turquoise
Lc06115	Mtr_2g449870	turquoise
Lc06122	Mtr_6g079550	turquoise
Lc06123	Mtr_6g079540	turquoise
Lc06128	Mtr_6g080710	turquoise
Lc06135	Mtr_2g031370	blue
Lc06136	Mtr_6g018970	yellow
Lc06142	Mtr_2g097900	turquoise
Lc06146	Mtr_2g086790	blue
Lc06149	Mtr_2g018590	blue
Lc06150	Mtr_2g018660	blue
Lc06151	Mtr_2g018670	turquoise
Lc06155	Mtr_2g020870	turquoise
Lc06158	Mtr_6g022710	yellow
Lc06167	Mtr_6g011330	turquoise
Lc06174	Mtr_2g034910	blue
Lc06177	Mtr_2g022520	yellow
Lc06180	Mtr_0252s0030	yellow
Lc06181	Mtr_6g059310	blue
Lc06182	Mtr_6g059930	turquoise
Lc06187	#N/A	blue
Lc06205	Mtr_2g037740	turquoise
Lc06206	Mtr_6g033290	turquoise
Lc06208	Mtr_5g040610	turquoise
Lc06217	Mtr_2g046780	turquoise
Lc06220	Mtr_2g073420	turquoise
Lc06222	Mtr_4g084130	blue
Lc06228	Mtr_2g032130	blue
Lc06231	#N/A	blue
Lc06239	Mtr_1g075310	turquoise
Lc06240	Mtr_0087s0010	turquoise
Lc06245	Mtr_2g067760	blue
Lc06248	Mtr_2g016620	blue
Lc06249	Mtr_2g016630	blue
Lc06250	Mtr_2g016640	turquoise
Lc06254	Mtr_0077s0010	blue
Lc06256	Mtr_2g017730	turquoise
Lc06258	#N/A	turquoise
Lc06261	Mtr_0016s0050	blue
Lc06265	Mtr_2g031510	turquoise
Lc06269	Mtr_2g087590	blue
Lc06271	Mtr_2g040470	turquoise
Lc06272	#N/A	turquoise
Lc06274	Mtr_6g488100	turquoise
Lc06275	Mtr_1g107155	blue
Lc06281	Mtr_2g078290	blue
Lc06283	Mtr_2g078310	blue
Lc06286	Mtr_2g034680	blue
Lc06293	Mtr_2g032540	blue
Lc06300	Mtr_6g011610	turquoise
Lc06312	Mtr_2g069190	turquoise
Lc06313	Mtr_2g069090	blue
Lc06315	Mtr_2g023850	yellow
Lc06322	Mtr_2g072530	blue
Lc06324	Mtr_2g066700	turquoise
Lc06325	Mtr_0074s0060	turquoise
Lc06328	Mtr_6g032770	turquoise
Lc06333	Mtr_2g048385	blue
Lc06335	Mtr_2g076490	yellow
Lc06336	Mtr_2g048210	blue
Lc06341	Mtr_6g023590	turquoise
Lc06342	Mtr_2g088107	turquoise
Lc06343	Mtr_2g088080	blue
Lc06349	Mtr_2g020360	blue
Lc06350	Mtr_2g020370	blue
Lc06351	Mtr_2g020380	blue
Lc06352	Mtr_2g020420	turquoise
Lc06357	Mtr_2g020590	turquoise
Lc06366	Mtr_4g014540	turquoise
Lc06369	Mtr_6g021910	blue
Lc06392	Mtr_6g093150	blue
Lc06393	Mtr_2g104140	turquoise
Lc06394	Mtr_2g104130	blue
Lc06396	Mtr_2g104110	blue
Lc06401	Mtr_2g105060	turquoise
Lc06403	Mtr_6g086680	yellow
Lc06405	Mtr_0286s0040	turquoise
Lc06407	Mtr_1g077160	yellow
Lc06412	Mtr_6g080430	blue
Lc06415	Mtr_2g076020	blue
Lc06416	Mtr_8g072550	turquoise
Lc06418	Mtr_2g089080	turquoise
Lc06419	Mtr_0939s0010	blue
Lc06423	Mtr_2g081100	turquoise
Lc06430	Mtr_6g037640	turquoise
Lc06432	Mtr_6g029470	yellow
Lc06433	Mtr_2g061380	turquoise
Lc06441	#N/A	turquoise
Lc06444	Mtr_2g022890	yellow
Lc06451	Mtr_2g013650	turquoise
Lc06452	Mtr_2g013640	yellow
Lc06454	Mtr_2g461260	blue
Lc06460	Mtr_2g028230	turquoise
Lc06467	Mtr_2g045420	turquoise
Lc06468	Mtr_2g043380	turquoise
Lc06476	Mtr_2g460800	blue
Lc06477	Mtr_2g090380	turquoise
Lc06478	Mtr_2g090380	turquoise
Lc06479	Mtr_2g090380	turquoise
Lc06483	Mtr_1g034260	turquoise
Lc06485	Mtr_2g450730	turquoise
Lc06487	Mtr_6g009510	turquoise
Lc06488	Mtr_6g087980	blue
Lc06493	Mtr_2g438400	turquoise
Lc06504	Mtr_4g032100	turquoise
Lc06510	Mtr_6g004230	yellow
Lc06512	Mtr_6g077930	turquoise
Lc06514	Mtr_2g034370	blue
Lc06521	Mtr_2g062840	turquoise
Lc06526	Mtr_2g075410	turquoise
Lc06529	Mtr_2g013940	blue
Lc06530	Mtr_2g026140	blue
Lc06533	Mtr_2g042700	blue
Lc06535	Mtr_2g042720	turquoise
Lc06541	Mtr_2g087820	yellow
Lc06542	Mtr_5g094760	turquoise
Lc06543	#N/A	yellow
Lc06545	Mtr_7g113913	blue
Lc06548	Mtr_2g044210	blue
Lc06550	Mtr_2g041550	turquoise
Lc06564	Mtr_3g110640	turquoise
Lc06565	Mtr_2g006100	turquoise
Lc06566	Mtr_2g006150	turquoise
Lc06569	Mtr_2g018990	blue
Lc06570	Mtr_2g043900	blue
Lc06572	Mtr_2g037760	turquoise
Lc06574	Mtr_6g011080	blue
Lc06575	Mtr_2g031380	turquoise
Lc06582	Mtr_5g034125	yellow
Lc06585	Mtr_2g062920	blue
Lc06588	Mtr_2g103590	turquoise
Lc06589	Mtr_2g103570	blue
Lc06594	Mtr_2g085170	blue
Lc06606	Mtr_6g082470	blue
Lc06607	Mtr_6g082480	turquoise
Lc06610	#N/A	turquoise
Lc06630	Mtr_2g091130	turquoise
Lc06633	Mtr_2g025020	blue
Lc06635	#N/A	blue
Lc06640	Mtr_3g099920	yellow
Lc06644	Mtr_6g080600	blue
Lc06649	Mtr_2g018105	turquoise
Lc06674	Mtr_2g036900	turquoise
Lc06675	Mtr_2g036910	blue
Lc06692	#N/A	yellow
Lc06699	Mtr_6g012800	blue
Lc06701	Mtr_2g438400	turquoise
Lc06710	Mtr_2g460740	turquoise
Lc06712	Mtr_2g018860	blue
Lc06715	Mtr_2g038510	turquoise
Lc06718	Mtr_2g039910	turquoise
Lc06726	Mtr_2g021070	turquoise
Lc06729	Mtr_2g022780	yellow
Lc06731	Mtr_2g460780	yellow
Lc06737	Mtr_0288s0040	blue
Lc06748	Mtr_6g005220	blue
Lc06749	#N/A	blue
Lc06750	Mtr_6g033580	yellow
Lc06752	Mtr_2g086920	turquoise
Lc06754	Mtr_0026s0010	blue
Lc06757	Mtr_2g081580	turquoise
Lc06760	Mtr_2g067980	turquoise
Lc06763	Mtr_0991s0010	blue
Lc06765	Mtr_2g028980	turquoise
Lc06770	Mtr_1g098490	turquoise
Lc06771	Mtr_2g067860	turquoise
Lc06777	Mtr_2g078360	blue
Lc06781	#N/A	turquoise
Lc06788	Mtr_6g053680	blue
Lc06789	Mtr_2g078340	blue
Lc06794	Mtr_2g059200	blue
Lc06795	Mtr_2g012560	yellow
Lc06797	Mtr_2g012520	yellow
Lc06801	Mtr_2g015630	blue
Lc06804	Mtr_2g015560	turquoise
Lc06805	Mtr_2g023070	turquoise
Lc06807	Mtr_6g022860	turquoise
Lc06819	Mtr_6g486230	blue
Lc06828	Mtr_2g082220	blue
Lc06829	Mtr_2g082220	blue
Lc06831	Mtr_6g022180	turquoise
Lc06838	Mtr_0294s0010	turquoise
Lc06839	#N/A	turquoise
Lc06840	Mtr_6g075170	blue
Lc06841	Mtr_6g075160	yellow
Lc06842	#N/A	turquoise
Lc06850	Mtr_6g025320	yellow
Lc06854	Mtr_2g061820	blue
Lc06855	Mtr_5g073360	turquoise
Lc06862	Mtr_1g040705	turquoise
Lc06866	Mtr_2g056190	turquoise
Lc06867	Mtr_2g055320	turquoise
Lc06877	Mtr_6g033315	turquoise
Lc06878	Mtr_6g033315	blue
Lc06885	Mtr_6g081810	blue
Lc06886	Mtr_6g081780	turquoise
Lc06889	Mtr_6g003960	turquoise
Lc06893	Mtr_2g436590	blue
Lc06911	Mtr_2g012990	blue
Lc06914	Mtr_2g013000	blue
Lc06922	Mtr_2g013120	yellow
Lc06926	Mtr_1g072060	turquoise
Lc06930	Mtr_2g013220	turquoise
Lc06939	Mtr_2g105680	turquoise
Lc06941	Mtr_2g102520	blue
Lc06943	Mtr_2g102490	turquoise
Lc06952	Mtr_6g085010	blue
Lc06955	#N/A	blue
Lc06958	Mtr_2g049790	turquoise
Lc06959	Mtr_2g049780	turquoise
Lc06960	Mtr_2g049770	blue
Lc06962	Mtr_2g049740	turquoise
Lc06971	Mtr_2g090210	turquoise
Lc06977	Mtr_6g053280	blue
Lc06981	Mtr_2g088400	turquoise
Lc06984	Mtr_0286s0040	turquoise
Lc06989	Mtr_2g019740	blue
Lc06993	Mtr_2g019810	blue
Lc07001	Mtr_6g092630	turquoise
Lc07010	Mtr_2g102277	blue
Lc07014	Mtr_5g007240	blue
Lc07015	#N/A	turquoise
Lc07020	Mtr_2g090765	turquoise
Lc07026	Mtr_2g102050	turquoise
Lc07027	Mtr_2g102040	turquoise
Lc07031	Mtr_2g054920	turquoise
Lc07033	Mtr_2g054940	turquoise
Lc07038	Mtr_2g044880	blue
Lc07045	Mtr_6g080440	turquoise
Lc07049	Mtr_2g014860	blue
Lc07050	Mtr_4g088115	yellow
Lc07060	Mtr_2g437910	turquoise
Lc07062	Mtr_2g064620	turquoise
Lc07065	Mtr_2g099560	yellow
Lc07072	Mtr_6g071280	yellow
Lc07074	Mtr_2g046130	blue
Lc07075	Mtr_2g046100	yellow
Lc07082	Mtr_6g016875	blue
Lc07086	#N/A	yellow
Lc07093	Mtr_2g017740	turquoise
Lc07095	Mtr_1g492910	blue
Lc07097	Mtr_1g089865	turquoise
Lc07098	Mtr_2g436880	yellow
Lc07102	Mtr_2g078010	yellow
Lc07104	Mtr_6g022260	turquoise
Lc07105	Mtr_6g022230	blue
Lc07108	Mtr_2g044600	turquoise
Lc07109	Mtr_1g007840	turquoise
Lc07113	Mtr_6g027690	turquoise
Lc07115	Mtr_6g027720	blue
Lc07116	Mtr_6g022830	blue
Lc07119	Mtr_2g039160	blue
Lc07129	Mtr_2g019100	yellow
Lc07131	Mtr_2g023680	turquoise
Lc07134	Mtr_2g028770	blue
Lc07135	Mtr_2g028750	yellow
Lc07142	Mtr_6g082450	turquoise
Lc07143	Mtr_2g048900	turquoise
Lc07145	Mtr_2g076330	blue
Lc07154	Mtr_2g064890	yellow
Lc07163	Mtr_2g024390	blue
Lc07168	Mtr_2g103130	yellow
Lc07169	Mtr_2g103140	blue
Lc07172	Mtr_2g100500	blue
Lc07173	Mtr_0057s0170	turquoise
Lc07177	Mtr_2g026180	yellow
Lc07178	Mtr_2g025740	blue
Lc07182	Mtr_2g044580	turquoise
Lc07184	Mtr_2g087120	turquoise
Lc07186	Mtr_1g035850	turquoise
Lc07188	Mtr_0110s0010	blue
Lc07189	Mtr_2g032100	turquoise
Lc07215	Mtr_2g103940	blue
Lc07216	Mtr_2g103950	turquoise
Lc07218	Mtr_8g006760	turquoise
Lc07219	Mtr_2g104010	turquoise
Lc07221	Mtr_2g104040	turquoise
Lc07227	Mtr_8g061130	turquoise
Lc07231	Mtr_0103s0010	yellow
Lc07233	Mtr_2g022660	turquoise
Lc07234	Mtr_2g022680	yellow
Lc07235	Mtr_2g042370	turquoise
Lc07237	Mtr_2g042450	blue
Lc07241	Mtr_6g017100	turquoise
Lc07245	Mtr_2g025080	yellow
Lc07255	Mtr_0002s0900	blue
Lc07256	Mtr_0002s0900	blue
Lc07257	Mtr_2g009620	blue
Lc07258	Mtr_2g009600	turquoise
Lc07292	Mtr_0274s0030	turquoise
Lc07296	Mtr_3g011150	turquoise
Lc07302	Mtr_2g084875	turquoise
Lc07314	Mtr_2g010740	yellow
Lc07321	Mtr_2g010750	yellow
Lc07322	Mtr_2g010760	blue
Lc07323	Mtr_4g109950	turquoise
Lc07328	Mtr_0583s0010	turquoise
Lc07333	Mtr_6g034205	turquoise
Lc07337	Mtr_2g086600	blue
Lc07342	Mtr_2g064495	blue
Lc07343	Mtr_1g060280	turquoise
Lc07346	Mtr_2g105410	blue
Lc07347	Mtr_2g105430	turquoise
Lc07348	Mtr_2g018010	turquoise
Lc07356	Mtr_2g040500	blue
Lc07357	Mtr_2g040510	turquoise
Lc07358	Mtr_2g040570	blue
Lc07360	Mtr_8g061970	blue
Lc07362	Mtr_2g437350	turquoise
Lc07365	Mtr_2g049420	turquoise
Lc07369	Mtr_2g078760	turquoise
Lc07374	Mtr_2g089665	blue
Lc07377	Mtr_6g016495	blue
Lc07382	Mtr_6g044830	turquoise
Lc07383	Mtr_6g044740	turquoise
Lc07385	Mtr_2g100930	turquoise
Lc07386	Mtr_2g101040	blue
Lc07388	Mtr_1g112130	blue
Lc07394	Mtr_2g035070	turquoise
Lc07401	Mtr_1g014390	turquoise
Lc07407	Mtr_3g071660	yellow
Lc07408	Mtr_2g042740	blue
Lc07409	Mtr_2g072830	turquoise
Lc07413	Mtr_2g096870	turquoise
Lc07414	Mtr_2g096850	turquoise
Lc07417	Mtr_2g010020	blue
Lc07419	#N/A	turquoise
Lc07420	Mtr_2g010120	yellow
Lc07421	Mtr_2g010160	yellow
Lc07428	Mtr_2g038000	turquoise
Lc07442	Mtr_2g041610	blue
Lc07448	Mtr_2g083180	yellow
Lc07454	Mtr_2g060760	turquoise
Lc07458	Mtr_2g100630	turquoise
Lc07459	Mtr_2g096000	turquoise
Lc07464	Mtr_2g063510	blue
Lc07473	Mtr_2g089120	turquoise
Lc07490	Mtr_0121s0060	blue
Lc07494	Mtr_2g039697	blue
Lc07498	Mtr_6g015390	blue
Lc07509	Mtr_2g450070	turquoise
Lc07513	Mtr_2g030200	blue
Lc07516	Mtr_2g435530	turquoise
Lc07520	Mtr_6g088470	turquoise
Lc07524	Mtr_2g036040	yellow
Lc07527	Mtr_2g034810	blue
Lc07529	Mtr_2g089510	turquoise
Lc07530	Mtr_6g087590	turquoise
Lc07540	Mtr_2g087090	blue
Lc07548	Mtr_3g088410	yellow
Lc07555	Mtr_2g055250	yellow
Lc07557	Mtr_2g032710	blue
Lc07558	Mtr_2g032690	blue
Lc07560	Mtr_2g083200	turquoise
Lc07562	Mtr_2g083220	turquoise
Lc07564	Mtr_6g071140	turquoise
Lc07566	Mtr_2g069680	blue
Lc07569	Mtr_2g069440	blue
Lc07573	Mtr_2g045050	yellow
Lc07574	Mtr_2g045060	turquoise
Lc07584	Mtr_6g004570	blue
Lc07589	Mtr_2g097230	blue
Lc07590	Mtr_4g087885	turquoise
Lc07591	Mtr_2g097210	blue
Lc07592	Mtr_2g097030	turquoise
Lc07599	Mtr_2g097740	yellow
Lc07605	Mtr_2g097800	blue
Lc07608	Mtr_2g097890	yellow
Lc07610	Mtr_2g097900	turquoise
Lc07611	Mtr_6g012500	blue
Lc07613	Mtr_2g090055	blue
Lc07615	#N/A	yellow
Lc07619	Mtr_2g104600	turquoise
Lc07620	Mtr_2g104610	blue
Lc07622	Mtr_6g079570	blue
Lc07629	Mtr_2g062980	blue
Lc07630	#N/A	turquoise
Lc07632	Mtr_2g100110	blue
Lc07635	Mtr_2g100090	blue
Lc07637	Mtr_2g100070	blue
Lc07639	Mtr_2g436530	blue
Lc07644	Mtr_2g041390	turquoise
Lc07649	Mtr_6g066300	blue
Lc07654	Mtr_6g028090	turquoise
Lc07655	Mtr_2g021260	blue
Lc07659	Mtr_1g055375	turquoise
Lc07660	Mtr_0044s0300	yellow
Lc07671	Mtr_6g083940	turquoise
Lc07672	Mtr_6g083930	blue
Lc07673	Mtr_6g009410	turquoise
Lc07681	Mtr_2g096090	turquoise
Lc07683	Mtr_6g027600	yellow
Lc07687	Mtr_6g027630	turquoise
Lc07688	Mtr_6g027630	turquoise
Lc07689	Mtr_2g064930	turquoise
Lc07690	Mtr_6g088755	blue
Lc07691	Mtr_6g088755	turquoise
Lc07692	Mtr_6g006060	turquoise
Lc07693	Mtr_6g018300	turquoise
Lc07703	Mtr_2g099350	turquoise
Lc07706	Mtr_6g090470	blue
Lc07707	Mtr_6g090520	turquoise
Lc07710	Mtr_0768s0010	turquoise
Lc07717	Mtr_2g034020	turquoise
Lc07718	Mtr_2g035310	turquoise
Lc07721	Mtr_6g073013	blue
Lc07722	Mtr_6g015370	blue
Lc07724	Mtr_6g086060	turquoise
Lc07736	Mtr_6g090535	blue
Lc07738	Mtr_4g129470	turquoise
Lc07741	Mtr_4g129490	turquoise
Lc07743	Mtr_5g013930	turquoise
Lc07744	Mtr_6g004610	turquoise
Lc07747	Mtr_2g045360	turquoise
Lc07753	#N/A	yellow
Lc07754	Mtr_6g009250	blue
Lc07756	Mtr_6g084520	blue
Lc07757	Mtr_1918s0010	turquoise
Lc07760	Mtr_2g072180	turquoise
Lc07763	Mtr_2g087840	blue
Lc07767	Mtr_2g047130	turquoise
Lc07769	Mtr_2g047110	blue
Lc07770	Mtr_3g006370	turquoise
Lc07779	Mtr_6g007647	turquoise
Lc07787	Mtr_6g012390	yellow
Lc07794	Mtr_2g034600	blue
Lc07795	Mtr_1g075047	blue
Lc07803	Mtr_2g017920	yellow
Lc07805	Mtr_6g464320	yellow
Lc07819	Mtr_2g035810	turquoise
Lc07825	Mtr_6g012280	blue
Lc07827	Mtr_6g081020	blue
Lc07834	Mtr_2g436860	blue
Lc07835	Mtr_2g036560	yellow
Lc07842	Mtr_2g070420	turquoise
Lc07846	Mtr_2g103840	blue
Lc07847	Mtr_6g016655	blue
Lc07848	Mtr_2g020020	turquoise
Lc07853	Mtr_2g020190	blue
Lc07854	Mtr_2g020210	blue
Lc07861	Mtr_2g026030	blue
Lc07873	Mtr_2g072510	blue
Lc07875	Mtr_0020s0020	blue
Lc07880	Mtr_6g069685	blue
Lc07884	Mtr_2g028190	blue
Lc07885	Mtr_2g028180	turquoise
Lc07887	Mtr_2g437960	turquoise
Lc07892	Mtr_2g020970	yellow
Lc07895	Mtr_6g060172	turquoise
Lc07896	Mtr_6g060175	turquoise
Lc07901	Mtr_2g034790	blue
Lc07902	Mtr_2g018780	blue
Lc07914	Mtr_6g088770	turquoise
Lc07918	Mtr_2g087520	turquoise
Lc07932	Mtr_2g042570	turquoise
Lc07939	Mtr_2g041190	turquoise
Lc07941	Mtr_2g080010	turquoise
Lc07942	Mtr_6g037510	blue
Lc07950	Mtr_2g010430	turquoise
Lc07953	#N/A	turquoise
Lc07956	#N/A	turquoise
Lc07958	Mtr_2g435810	blue
Lc07960	Mtr_2g105260	blue
Lc07963	Mtr_2g105270	turquoise
Lc07966	#N/A	turquoise
Lc07984	Mtr_2g450710	yellow
Lc07994	Mtr_2g438150	turquoise
Lc07995	Mtr_2g054680	blue
Lc07996	Mtr_4g016590	turquoise
Lc07997	Mtr_5g017140	blue
Lc07998	Mtr_6g049280	turquoise
Lc08000	Mtr_6g085170	turquoise
Lc08004	Mtr_4g105570	blue
Lc08006	Mtr_4g105600	blue
Lc08011	Mtr_2g096300	turquoise
Lc08013	Mtr_2g096340	blue
Lc08021	Mtr_2g090120	blue
Lc08027	Mtr_2g064470	turquoise
Lc08028	Mtr_2g101500	yellow
Lc08029	Mtr_2g101480	blue
Lc08036	Mtr_2g101360	blue
Lc08037	Mtr_2g101360	blue
Lc08038	Mtr_2g101350	turquoise
Lc08039	Mtr_6g015350	turquoise
Lc08044	Mtr_6g033525	blue
Lc08047	Mtr_6g013805	blue
Lc08050	Mtr_2g036860	blue
Lc08051	Mtr_3g013680	turquoise
Lc08056	Mtr_2g104180	yellow
Lc08057	#N/A	yellow
Lc08064	Mtr_2g088270	turquoise
Lc08068	Mtr_2g055910	blue
Lc08069	Mtr_2g055990	blue
Lc08077	Mtr_2g101990	blue
Lc08079	#N/A	yellow
Lc08089	Mtr_0221s0060	turquoise
Lc08103	Mtr_0066s0050	blue
Lc08105	Mtr_2g095510	turquoise
Lc08113	Mtr_2g105230	turquoise
Lc08115	Mtr_6g087140	turquoise
Lc08120	Mtr_2g062610	blue
Lc08121	Mtr_6g090130	turquoise
Lc08122	#N/A	yellow
Lc08125	Mtr_0167s0040	turquoise
Lc08129	Mtr_0119s0010	turquoise
Lc08131	Mtr_2g008130	turquoise
Lc08138	Mtr_2g008210	yellow
Lc08141	Mtr_1g106860	blue
Lc08144	Mtr_2g008400	turquoise
Lc08145	Mtr_2g008360	turquoise
Lc08148	Mtr_2g008440	turquoise
Lc08149	Mtr_2g008470	yellow
Lc08153	Mtr_2g008580	blue
Lc08157	Mtr_2g008710	turquoise
Lc08164	Mtr_7g116990	turquoise
Lc08165	Mtr_2g008840	turquoise
Lc08166	Mtr_2g008850	turquoise
Lc08175	Mtr_2g037940	yellow
Lc08185	Mtr_6g042240	blue
Lc08193	#N/A	turquoise
Lc08196	Mtr_2g020720	turquoise
Lc08198	Mtr_2g020770	yellow
Lc08203	Mtr_6g093070	blue
Lc08207	Mtr_6g007737	turquoise
Lc08211	Mtr_6g043620	blue
Lc08213	Mtr_6g037340	turquoise
Lc08219	Mtr_2g038200	blue
Lc08224	Mtr_2g015370	blue
Lc08229	Mtr_2g073370	turquoise
Lc08234	Mtr_6g008690	turquoise
Lc08236	Mtr_2g009750	blue
Lc08238	Mtr_2g009770	turquoise
Lc08245	Mtr_2g009980	turquoise
Lc08251	Mtr_2g041090	turquoise
Lc08252	Mtr_2g435490	turquoise
Lc08262	Mtr_4g103720	turquoise
Lc08266	Mtr_2g079490	blue
Lc08272	Mtr_2g028000	turquoise
[truncated: 7,199 more rows]
